1 **Application of ConvNeXt with Transfer Learning and Data Augmentation**  
2 **for Malaria Parasite Detection in Resource-Limited Settings Using**  
3 **Microscopic Images**

4

5 Outlwile Pako Mmileng<sup>1\*</sup>, Albert Whata<sup>2</sup>, Micheal Olusanya<sup>3</sup>, Siyabonga Mhlongo<sup>4</sup>

6

7 1 Centre for Applied Data Science, University of Johannesburg, Johannesburg, South Africa

8 2 Department of Statistics, University of Pretoria, Pretoria, South Africa

9 3 Department of Computer Science and Information Technology, Sol Plaatje University,

10 Kimberley, South Africa

11 4 Department of Applied Information Systems, University of Johannesburg, Johannesburg,

12 South Africa

13

14 \* Corresponding author

15 Email: [223257123@student.uj.ac.za](mailto:223257123@student.uj.ac.za) (OPM)

16

17 **Abstract**

18

19 Malaria is one of the most widespread and deadly diseases across the globe, especially in sub-  
20 Saharan Africa and other parts of the developing world. This is primarily because of incorrect  
21 or late diagnosis. Existing diagnostic techniques mainly depend on the microscopic  
22 identification of parasites in the blood smear stained with special dyes, which have drawbacks  
23 such as being time-consuming, depending on skilled personnel and being vulnerable to errors.

24

25 This work seeks to overcome these challenges by proposing a deep learning-based solution in  
26 the ConvNeXt architecture incorporating transfer learning and data augmentation to automate  
27 malaria parasite identification in thin blood smear images. This study's dataset was a set of  
28 blood smear images of equal numbers of parasitised and uninfected samples drawn from a  
29 public database of malaria patients in Bangladesh. To detect malaria in the given dataset of  
30 parasitised and uninfected blood smears, the ConvNeXt models were fine-tuned. To improve  
31 the effectiveness of these models, a vast number of data augmentation strategies was used so  
32 that the models could work well in various image capture conditions and perform well even in  
33 environments with limited resources. The ConvNeXt Tiny model performed better, particularly  
34 the re-tuned version, than other models, such as Swin Tiny, ResNet18, and ResNet50, with an  
35 accuracy of 95%. On the other hand, the re-modified version of the ConvNeXt V2 Tiny model  
36 reached 98% accuracy. These findings show the potential to implement ConvNeXt-based  
37 systems in regions with scarce healthcare facilities for effective and affordable malaria  
38 diagnosis.

39

40 Keywords: ConvNeXt, deep learning, malaria detection, medical imaging, resource-limited  
41 settings transfer learning,

42

## 43 1. Introduction

44

45 According to the World Health Organization (WHO), there were 241 million cases and 627,000  
46 deaths due to malaria in 2020, with the disease primarily affecting low-income countries (1).  
47 Malaria is an infectious disease caused by parasitic protozoa of the genus *plasmodium*, of which  
48 *plasmodium falciparum* and *plasmodium vivax* are the most pathogenic to man (2). These are  
49 transmitted through the bites of infected *Anopheles* mosquitoes. In malaria-endemic areas,  
50 timely and correct diagnosis is critical to prevent complications and minimise transmission.  
51 However, access to accurate diagnostic instruments is still problematic, especially in low-  
52 income regions.

53

54 Malaria diagnosis is usually performed by examination of thick and thin giemsa stained blood  
55 films where the laboratory technologists manually use microscopes to look for the malaria  
56 parasites (3, 4). Even though this approach is reasonably practical, it is rather time-consuming,  
57 somewhat subjective and dependent on qualified specialists. Some reasons include technician  
58 fatigue, poor imaging conditions, or variability in the blood smear preparation. Using artificial  
59 intelligence, specifically deep learning, to develop automated diagnostic tools can be an  
60 excellent solution to increase diagnostic efficiency and decrease the workload of healthcare  
61 professionals in limited resource settings (5).

62

63 Convolutional neural networks (CNNs), a type of deep learning, are very effective in the  
64 automated diagnosis of medical images. CNNs have been applied in many applications,  
65 including disease diagnosis, object identification, and segmentation (6). However, standard  
66 CNNs are data-hungry and labelled medical data are limited in many regions worldwide (7).  
67 To address these problems, this study uses the ConvNeXt architecture, which combines the

68 ease of use of conventional CNNs with the hierarchical feature extraction of the latest models,  
69 such as vision transformers (ViTs).

70

71 The objectives of this study are as follows:

- 72 • To build a robust automated malaria diagnostic tool using the ConvNeXt architecture.
- 73 • To improve performance using transfer learning from pre-trained models on large  
74 datasets such as ImageNet.
- 75 • To investigate how data augmentation can make the model more robust in  
76 heterogeneous and low-resource situations.
- 77 • To evaluate the performance of ConvNeXt compared to other state-of-the-art  
78 architectures such as ResNet and Swin Transformer in terms of accuracy and  
79 computational efficiency.

80

81 In Figure 1, it is observed that the proposed ConvNeXt, which is a modernised convolutional  
82 neural networks architecture, outperforms other current complex models such as ResNet, DeiT,  
83 and Swin Transformer in both accurate training and computationally efficient when trained on  
84 ImageNet datasets (8). ConvNeXt applies to many fields due to its scalability and enhanced  
85 performance obtained through training on extensive datasets like ImageNet-22 (9).

86

87 Figure 1: Performance of ConvNext on ImageNet. Source: (8)

88

89 Given the scarcity of big medical-labelled datasets, transfer learning and data augmentation  
90 have been extensively used in this work. Transfer learning is a technique that enables the  
91 models to use the knowledge learned from one task and apply it to another task, such as malaria  
92 detection from images. Conversely, the data augmentation technique enhances the dataset's

93 size by manipulating the image conditions to make the model less sensitive to practical  
94 variations.

95

96 This study explores a novel application of the ConvNeXt architecture, combining transfer  
97 learning with advanced data augmentation techniques for medical imaging. In contrast to  
98 conventional deep learning, feature extraction capabilities can be improved by transferring  
99 knowledge from the large-scale ImageNet dataset despite the relatively small dataset.  
100 Moreover, integrating explainable AI tools like LIME and LLaMA brings a unique dimension  
101 to a diagnostic process where the model's decision-making can be visually and textually  
102 interpreted. These innovations highlight the opportunities for AI-driven systems to enhance  
103 diagnosis accuracy while promoting greater clinician acceptance by being transparent in AI  
104 predictions.

105

## 106 **2. Materials and Methods**

107

### 108 2.1 Dataset Acquisition

109

110 The dataset used for training and evaluating the deep learning models in this study was obtained  
111 from the Lister Hill National Center for Biomedical Communications (LHNCBC), part of the  
112 National Library of Medicine (NLM), which hosts a publicly available collection of malaria-  
113 infected blood smear images, available at (10). This dataset was initially collected at the  
114 Chittagong Medical College Hospital in Bangladesh, and the data are made up of thin blood  
115 smear images (11). The dataset comprises 27,558 images evenly distributed between  
116 parasitised and uninfected samples, with each category containing 13,779 images.

117

118 This balanced distribution ensures the reliability and validity of subsequent analyses and  
119 research findings (12). It prevents the model from being trained to overemphasise one class  
120 over the other in cases where the dataset could be more balanced between the two categories.

121

122 The blood smear images were photographed using a smartphone camera, which was held up to  
123 the eyepiece of a microscope; this configuration mimics the conditions likely to be found in  
124 low-resource settings. All the images were obtained from the blood smears stained with giemsa,  
125 the standard method of malaria diagnosis by microscopy. The images were then reviewed and  
126 labelled by expert technicians to determine whether or not the parasites were present. Each  
127 image had a dimension of 5312x2988 pixels, with the circular area depicted as the view through  
128 the microscope lens. As a result of the limited resources used in the imaging of blood smears  
129 and the variability in the preparation of the samples, the images had variations in lighting,  
130 contrast, and colour balance.

131

132 To avoid any possibility of identifying patients who may be reflected in the dataset, the patient  
133 data were de-identified before online publication. The Institutional Review Board (IRB)  
134 approved using the data at the NLM (IRB#12972)(11). Additionally, this study received ethical  
135 clearance from the University of Johannesburg's School of Consumer Intelligence and  
136 Information Systems Research Ethics Committee (SCiSREC) under ethical clearance code  
137 2024SCiS040. This clearance is valid for three years, starting on 1 August 2024. This approval  
138 ensures that the use of the data complies with the set ethical procedures for handling and  
139 analysing medical data.

140

141 In Table 1, the image counts are supplemented with both categories' mean and standard  
142 deviation.

143 Table 1: Image Statistics for Parasitised and Uninfected Categories

| Category    | Image Count | Mean (R, G, B)           | Standard Deviation (R, G, B) |
|-------------|-------------|--------------------------|------------------------------|
| Parasitised | 13,779      | [0.4507, 0.3882, 0.3955] | [0.3109, 0.2954, 0.2656]     |
| Uninfected  | 13,779      | [0.4478, 0.4841, 0.4634] | [0.2966, 0.3222, 0.2919]     |

144

145 The mean and standard deviation values are pixel intensities, which are the extent of brightness  
146 or colour of a pixel on an image (13). The pixel intensity values are from red, green, and blue  
147 (RGB). These channels amount to the image's colour, which ranges from 0, representing black,  
148 to 1, representing white. These are colour measurements for the pictures and consist of average  
149 colour intensities of the parasitised and uninfected samples regarding brightness and colour  
150 changes (14). As the value in a channel increases, the corresponding pixel intensity value will  
151 increase, implying a light and or intense colouration.

152

153 Pixel intensity analysis has been applied to detect parasites within microscopic images,  
154 particularly in identifying infected and uninfected cells. Studies such as (14) have shown the  
155 use of pixel intensities for classifying stained microscopy images based on colour variations.  
156 Similarly, several studies have demonstrated that pixel intensities are useful in diagnosing  
157 parasitic conditions (15-18). These works provide solid grounds for using pixel intensities,  
158 particularly in automated diagnostic systems.

159

160 The average pixel intensity of the colour channels in the "Parasitised" images is Red = 0.4507,  
161 Green = 0.3882, Blue = 0.3955. This indicates that the 'Parasitised' images have moderate  
162 pixel intensity levels in these channels. The standard deviations for the same set of images are  
163 approximately 0.3109, 0.2954 and 0.2656, indicating the pixels' spread of intensity values. A  
164 larger standard deviation indicates greater dispersion; in this case, the dispersion is relatively

165 moderate across the colour channels, which means there is some difference in image quality or  
166 staining intensity but not too extensive.

167

168 The pixel intensities for the “Uninfected” images are 0.4478, 0.4841, and 0.4634 in the three  
169 colour channels. These values show slightly higher pixel intensity, especially in the Green and  
170 Blue channels, than the “Parasitised” images. The standard deviations for the “Uninfected”  
171 images, which are 0.2966, 0.3222, and 0.2919, also indicate that the pixel intensity is  
172 moderately dispersed, similar to the “Parasitised” images but with variability across the  
173 channels. This dataset is well-balanced and statistically stable, which allows for the practical  
174 training of malaria detection models.

175

## 176 **2.2 Image Pre-processing**

177

### 178 2.2.1 Image Resizing

179

180 The data used in this study were pre-processed before being applied to the deep-learning  
181 models used in this study. The input size of the original images at a resolution of 5312x2988  
182 pixels offered an abundance of visual information; however, they were computationally costly  
183 and were not appropriate for the input dimensions of most current deep learning architectures.  
184 To this end, all images were resized to 224×224 pixels as most of the current ConvNeXt, Swin  
185 Transformer, and ResNet models have a standard input image size of 224×224 pixels (19).

186

187 These steps are essential, especially in resizing the images, because this has an impact on the  
188 speed with which the models can process the data; it lowers the memory usage during the  
189 process and allows the training of the models to be more efficient without losing much detailed



190 information that is important in identifying malaria parasites. However, in most cases, when  
191 images are resized, they tend to lose some details, which can be crucial, especially when the  
192 resizing is performed to a great extent, such as here (20).

193

194 To avoid loss of information during image resizing, the Lanczos interpolation filter was used  
195 during the resizing of the image in Python, a method used for image scaling when the quality  
196 of the image should be preserved when downscaled (21, 22).

197

198 Lanczos interpolation is employed to resize the images while preserving the edges and fine  
199 details of the images by using the ‘sinc’ function so that the morphology of malaria parasites  
200 is well retained in the resized images (21, 23). Thus, applying this method, the details of the  
201 pre-processed images were preserved, which is crucial for accurately detecting and classifying  
202 the parasitised and uninfected blood smears by the deep learning models. Hence, despite the  
203 lower image resolution, which helped to enhance computational speed, the Lanczos filter was  
204 used to maintain an adequate image quality for the intended application.

205

206 Sinc or sinus cardinalis is a mathematical function applied in signal processing, especially in  
207 image processing for interpolation, especially in resampling or resizing images (24). The sinc  
208 function is defined as:

209

$$\text{sinc}(x) = \frac{\sin(\pi x)}{\pi x} \quad (1)$$

210

211

212 The sinc function, shown in Equation 1, is a continuous and periodic function defined by  
213 oscillations and decreases when moving away from zero (25). The sinc function is essential in

214 Fourier analysis and can be described as the ideal low-pass filter in the frequency domain. It  
215 avoids the problem of aliasing, where different signals appear identical when sampled and  
216 produce distorted resampled images or signals.

217

218 This study uses the sinc function in Lanczos interpolation, which calculates new pixel colours  
219 while an image is being scaled. The sinc function decays and can be used as a weighting  
220 function when resampling surrounding pixel values, which produces much smoother  
221 transitions between pixels (26). This allows high-frequency details, such as sharp edges, to be  
222 kept when the image size is decreased, which is essential when dealing with the images of  
223 blood smears used in malaria detection.

224

### 225 2.2.2 Image normalisation

226

227 After resizing the images, the normalisation process was performed to ensure that pixel  
228 intensities were consistent in the dataset. Normalisation is an essential procedure in deep  
229 learning since it enhances the stability of the learning process by preventing variations in the  
230 properties of the input data (27, 28). For the normalisation, the mean and the standard deviation  
231 of the pixel values of the images in each of the three colour channels, namely the red, the green  
232 and the blue, were computed.

233

234 The numerical results of the calculated mean values are listed in Table 1, are 0.4507 for the red  
235 channel, 0.3882 for the green channel and 0.3955 for the blue channel; the standard deviation  
236 values are 0.3109, 0.2954 and 0.2656, respectively. These values were then applied to  
237 normalise each image to ensure their pixel values had a mean around zero and the variance was  
238 one. This pre-processing step is essential to aid the models in learning and performing well

239 when faced with data they have not encountered before by normalising the brightness and  
240 contrast of the images.

241

### 242 2.3 Data augmentation

243

244 Data augmentation is significant because it improves the transferability of the deep-learning  
245 models for malaria parasite identification (29). The lack of large, high-quality datasets is a  
246 common challenge in low-resource settings. Thus, data augmentation is useful in artificially  
247 increasing the amount of available data and introducing variability typical in real-life  
248 conditions (30, 31). To definite the models and make them capable of identifying the malaria  
249 parasites in varied situations, many data augmentation operations were performed on the base  
250 images, thereby creating a large dataset.

251

252 In this study, the techniques used for data augmentation were used for imitating diverse  
253 conditions under which blood smear images may be taken. Horizontal flipping applied the  
254 transformation that reflected the images across the x-axis, and vertical flipping was the  
255 transformation that reflected the images along the y-axis (32). These steps were critical to  
256 enable the model to learn how to identify malaria parasites, irrespective of their orientation. In  
257 the case of blood smear microscopy, the placement of the smears is only sometimes consistent.

258

259 Rotation is another transformation, where images were rotated at an angle of 45 degrees (33,  
260 34). While preparing and analysing blood smears, they may not always be appropriately placed;  
261 hence, the model should be able to deal with rotated images. Scaling was used to control the  
262 size of the images with a scaling factor of 0.5 to 1.5 (33). This enhancement was functional in  
263 modelling the different magnification levels because the observed visual characteristics may

264 range in size based on the microscope's settings. This is because by training on scaled images,  
265 the model is in a better position to detect parasites regardless of their size.

266

267 Gaussian noise was added to the images to simulate potential noise observable in real-world  
268 image acquisition. The noise levels varied from 0.01 to 0.05 times the maximum pixel intensity  
269 value, which is 255 (33, 35). This made the training images similar to those taken in conditions  
270 that are not favourable, such as low light or inadequate focus of the camera. Contrast  
271 adjustments were made, whereby the contrast values were changed by a factor of 0.8 to 1.2  
272 (33). Using contrast-enhanced images, the model could learn and distinguish parasites even in  
273 different image contrasts, thus improving its performance in different diagnostic conditions.

274

275 Besides these fundamental transformations, some more specific affine transformations were  
276 used, such as shearing (33), which changes the image along the x- or the y-axis to mimic some  
277 shifting or distortion that may occur while preparing the slides. Several techniques of blurring  
278 the images were used to make the images appear out of focus. Gaussian blurring with a sigma  
279 range of 0.0 to 3.0 was applied to the images (36). These techniques imitated the conditions of  
280 blurred images due to improper focus on the microscope, and thus, the model learned to  
281 recognise parasites in somewhat blurred images.

282

283 Sharpening was applied to the images to make the details more apparent, with the alpha range  
284 from 0 to 1 and lightness range from 0.75 to 1.5 (37). Sharpening improves the details in the  
285 images, especially the edges of the parasites, which are very important in identification.  
286 Colour-based augmentations, such as changes to hue and saturation, were also incorporated  
287 (38). These adjustments were informed by differences in staining method when preparing blood  
288 smears and differences in lighting or imaging systems. Elastic transformation and dropout were

289 also applied, introducing more variability. The elastic deformations, which were controlled by  
290  $\alpha=50$  and  $\sigma=5$ , caused minor shifting of the image, and this was beneficial as the model  
291 could identify parasites even if there was a slight deformation in the image (39, 40).

292 Cropping was performed randomly by removing parts of the image with 0.02 to 0.1 pixels (41).  
293 This transformation aided in the model being more generalised so that it could still predict the  
294 images even if some parts of the images were cut or blurred. Channel shuffling was applied  
295 with a probability of 0.35, where the colour channels of the images were randomly  
296 interchanged to cope with colour channel variations (42).

297

298 Applying these transformations increased the dataset to 606,276 samples, where 303,138 is the  
299 number of parasitised samples and 303,138 is the number of uninfected samples. The mean  
300 pixel values for the parasitised images were proposed to be [0.44839746, 0.38788548,  
301 0.39583275] while those of the uninfected images were [0.4479274, 0.4817927, 0.46273437].  
302 The standard deviations were 0.30283427, 0.28804937 and 0.26085448 for the parasitised  
303 category, while those of the uninfected category were 0.2897945, 0.313396 and 0.285556.  
304 These statistics demonstrate the effects of the augmentation process that made the dataset more  
305 extensive and diverse in terms of the images' features.

306

307 Figure 2 visually represents the dataset after data augmentation, explicitly comparing the  
308 number of images in two categories: The two main groups used in this study were parasitised  
309 and uninfected. There are two categories in total, each of them including about 303,138 images,  
310 proving the balanced distribution of the dataset after the augmentation process. This is very  
311 important in training the machine learning models, particularly in classification problems, to  
312 avoid being influenced by one category due to data sampling.

313

314 Figure 2: Image count per category (After data augmentation)

315

316 The augmentation made it possible to introduce variability in the form of geometric  
317 transformations, noise, scaling and colour variations, among others, as shown in Figure 3. This  
318 was performed by adding more training images and mimicking many scenarios one might  
319 encounter when capturing blood smears in practice, thus improving the generalisation  
320 capability of the models. Such augmentation aims to ensure that the models can identify the  
321 malaria parasites identifiable across various images and illumination and rotations, which are  
322 common in real-world applications.

323

324 Figure 3: Sample images after data augmentation

325

326 Table 2 summarises the basic descriptive statistics of the characteristics of the augmented  
327 dataset used to train the malaria detection models. As seen in Table 2, the statistics of the  
328 dataset are reasonably even, and pixel intensity and variation are slightly different between  
329 Parasitised and Uninfected images, which will help the model during training. These colour  
330 distribution patterns are significant as they enable the model to distinguish between the  
331 parasitised and uninfected blood smear images, thus enhancing the model's performance.

332

333 Table 2: Image Statistics for Parasitised and Uninfected Categories (After Augmentation)

| Category    | Image Count | Mean (R, G, B)                       | Standard Deviation (R, G, B)            |
|-------------|-------------|--------------------------------------|-----------------------------------------|
| Parasitised | 303,138     | [0.44839746, 0.38788548, 0.39583275] | [0.30283427, 0.28804937,<br>0.26085448] |
| Uninfected  | 303,138     | [0.4479274, 0.4817927, 0.46273437]   | [0.2897945, 0.313396, 0.285556]         |

334

335

## 336 2.4. Algorithms

337

338 This paper utilised several sophisticated deep-learning models to identify malaria parasites in  
339 microscopic blood smear images. These models cover various architectures that effectively  
340 capture local details, e.g., parasite shapes, and global information, e.g., cell distributions, in the  
341 images. The models used were the Swin Transformer (Swin Tiny), ResNet18, ResNet50,  
342 ConvNeXt Tiny, ConvNeXt V2 Tiny, and a modified version of ConvNeXt V2 called  
343 ConvNeXt V2 Remod. Every architecture has been chosen to work with high-resolution  
344 medical images and, at the same time, employ transfer learning, allowing the model to take  
345 knowledge from previously trained models trained on large datasets like ImageNet.

346

### 347 Swin Transformer Architecture

348

349 This study used the Swin Transformer, particularly the Swin Tiny model, to exploit its window-  
350 based multi-head attention (43). This architecture splits the input images into multiple non-  
351 overlapping local windows and then learns the self-attention from these local windows. This  
352 way, Swin Transformers can capture regional and global information in images, which is  
353 beneficial for tasks such as medical image analysis (44). The Swin Transformer architecture,  
354 as shown in Figure 4, is where images are divided into a sequence of non-overlapping patches.  
355 Then, a linear embedding layer is applied to generate patch tokens. This architecture is divided  
356 into four stages. Each stage consists of several Swin Transformer blocks and a patch merging  
357 layer, which reduces spatial dimensions while increasing the feature dimensions, allowing for  
358 both local and global context to be effectively captured across the entire image.

359

360 Figure 4: Architecture of a Swin Transformer. Source (43)

361 Mathematically, the self-attention mechanism within a Swin Transformer can be represented  
362 as:

363

$$Attention(Q,K,V) = softmax\left(\frac{QK^T}{\sqrt{d_k}}\right)V \quad (2)$$

364

365 where Equation 2 represents the queries, keys, and values, respectively, and  $d_k$  is the dimension  
366 of the keys. The model incorporates a relative position bias term that enhances its ability to  
367 encode the spatial structure within each window.

368

369 Swin Tiny was pre-trained on ImageNet-1K, a dataset containing over a million labelled  
370 images. It achieved a top-1 accuracy of 81.2% and a top-5 accuracy of 95.5% on ImageNet,  
371 with 28 million parameters and a computation cost of 4.5 GFLOPs (45).

372

373 ResNet Architectures

374

375 The ResNet18 and ResNet50 were selected as the baseline models to be compared with the  
376 proposed models. These models are a part of the Residual Networks, which are the types of  
377 neural networks developed to address the vanishing gradient problem that is a big challenge in  
378 training deep neural networks (46). The residual block is central to ResNet's architecture and  
379 is expressed mathematically as:

380

$$y = F(x,(W_i)) + x \quad (3)$$

381



382 where  $x$  is the input,  $F(x, (W_i))$  is the learned transformation with weights  $W_i$  and  $y$  is the block  
383 output, as shown in Equation 3. This structure helps the network to learn identity mapping  
384 when deeper layers do not help enhance performance and allow a flow of gradients across many  
385 layers.

386

387 ResNet18 is a less complex model with 18 layers, while ResNet50 is a deeper model with 50  
388 layers; hence, it can learn more complex data features. ResNet18 was pre-trained on ImageNet  
389 and fine-tuned for malaria detection, and the second model was pre-trained on ImageNet and  
390 fine-tuned for malaria detection (47). Although ResNet18 was used as the baseline model,  
391 ResNet50 had a deeper network and could thus identify more intricate visual patterns in the  
392 blood smear images and differences between them (48).

393

394 ConvNeXt and ConvNeXt V2 Architectures

395

396 ConvNeXt Tiny, a novel architecture based on conventional convolutional neural networks  
397 (CNNs), was another critical architecture used in this study (49, 50). Also based on Vision  
398 Transformers (ViTs), ConvNeXt is a model that combines the hierarchical architecture to  
399 incorporate both high and low-level features of images. Consequently, the feature extraction of  
400 Swin Transformer, ResNet, and ConvNeXt model block designs are different, as shown in  
401 Figure 5. Swin Transformer block captures local and global features with multi-head self  
402 attention (MSA) with shifted windows ( $w7 \times 7$ ), followed by layer normalisation and Gaussian  
403 Error Linear Unit (GELU) activation. A ResNet block is designed based on the residual  
404 structure of  $1 \times 1$  and  $3 \times 3$  convolutions, batch normalisation and Rectified Linear Unit (ReLU)  
405 activation to help feature learning. ResNet is modernised to ConvNeXt block by replacing  $3 \times 3$

406 convolutions with depthwise convolutions (d7x7) with an extra parameter of channel  
407 multiplier, as well as using layer normalisation and GELU activation for better efficiency.

408

409 Figure 5: Block designs for the used models. Source (8).

410 The core operation in ConvNeXt is convolution, mathematically described as:

$$(S * K)(i,j) = \sum_m \sum_n S(i + m, j + n)K(m,n) \quad (4)$$

411

412 In Equation 4, S represents the input matrix (image), K, in Equation 4, is the convolutional  
413 kernel, and (i,j) denotes spatial positions in the image. ConvNeXt Tiny model was pre-trained  
414 on ImageNet, with the top-1 accuracy of 82.1% and has 28M parameters and 4.5 GFLOPs of  
415 computation. The pre-trained model was downloaded from GitHub and then fine-tuned to the  
416 malaria dataset to teach the model the features of detecting malaria parasites.

417

418 Following the success of ConvNeXt, ConvNeXt V2 had additional architectural enhancements,  
419 including learning rate scheduling and modified activation functions for improving the image  
420 classification task performance (50). The ConvNeXt V2 Tiny model employed in this study,  
421 which was also pre-trained on ImageNet, provided a top-1 accuracy of 83.0 per cent and had a  
422 computational complexity of 4.47 GFLOPs with 28.6 million parameters. Similar to  
423 ConvNeXt V2, the model was fine-tuned on the malaria dataset to change the pre-trained  
424 weights of the model to adapt to the characteristics of the images of parasitised and uninfected  
425 blood smears.

426

427 ConvNeXt V2 Remod

428

429 This study's ConvNeXt V2 Remod model was based on the ConvNeXt V2 Tiny architecture.  
430 In the training process, label smoothing was used with  $\alpha=0.1$  (51, 52). Label smoothing shifts  
431 the target labels to prevent the model from attaining extreme confidence and helps deter the  
432 overfitting of the model (52). Mathematically, label smoothing modifies the loss function as  
433 follows:

434

$$L_{CE} = - \sum_{i=1}^N \left( (1 - \alpha)y_i + \frac{\alpha}{C} \right) \log(\hat{y}_i) \quad (5)$$

435

436 where  $C$  is the number of classes (in this case,  $C=2$  for binary classification),  $\alpha$  distributes  
437 a small part of the probability mass to the incorrect classes, as shown in Equation 5.

438 The block structures of ConvNeXt V1 and V2, shown in Figure 6, show the core improvements  
439 made from one version to the other. The ConvNeXt V1 block consists of depthwise  
440 convolutions ( $d7 \times 7$ ) and then layer normalisation (LN) and GELU activation for efficient  
441 feature extraction. The first version of the model introduced LayerScale, which helped stabilise  
442 the process. On the other hand, the ConvNeXt V2 block keeps the heart of V1 but introduces  
443 Generalised ReLU Normalisation (GRN). This new state-of-the-art normalisation technique  
444 enhances the model's stability and efficacy. This addition of GRN with the elimination of  
445 LayerScale boosts the generalisation ability of ConvNeXt V2 across several tasks.

446

447 Figure 6: ConvNeXt block designs. Source (50).

448

449 The AdamW optimiser, shown in Equation 6, was selected for this task as it is a version of the  
450 Adam optimiser with weight decay for better generalisation and reduced overfitting (53, 54).  
451 AdamW updates the model's weights using first- and second-order moments of the gradients.

452 The main distinction between Adam and AdamW is that in AdamW, the weight decay is not  
453 applied directly to the gradients, which allows the magnitude of the weights to be preserved.

454

455 The learning rate was set to 0.0005, and a weight decay of 0.01 was applied to penalise large  
456 weights, thus avoiding overfitting the training data (55). The AdamW optimiser is defined as:

457

$$m_t = \beta_1 m_{t-1} + (1 - \beta_1) g_t$$

$$v_t = \beta_2 v_{t-1} + (1 - \beta_2) g_t^2$$

$$\hat{m}_t = \frac{m_t}{1 - \beta_1^t}, \hat{v}_t = \frac{v_t}{1 - \beta_2^t} \quad (6)$$

$$\theta_t = \theta_{t-1} - \alpha \frac{\hat{m}_t}{\sqrt{\hat{v}_t} + \epsilon}$$

458 where:

459  $g_t$  is the gradient of the loss with respect to the parameters at step  $t$

460  $m_t$  and  $v_t$  are the moving averages of the gradient and its square, respectively,

461  $\theta_t$  represents the model parameters at step  $t$

462  $\alpha$  is the learning rate, and

463  $\beta_1$ ,  $\beta_2$  and  $\epsilon$  are hyperparameters of the optimiser.

464

465 To improve learning efficiency, the OneCycleLR scheduler was applied (56). This scheduler  
466 modifies the learning rate throughout training to balance exploration (high learning rate) and  
467 refinement (low learning rate). The learning rate is first set to maximum value and then

468 decreases over time, which helps the model avoid local minimum in the initial training phase  
469 while fine-tuning the weights when training continues.

470

471 This is set to zero initially, rises to a maximum of 0.0005 and then decreases using a cosine  
472 annealing schedule, shown in Equation 8, over ten epochs. The cosine annealing formula is  
473 given as Equation 7 by:

474

$$\eta_t = \eta_{min} + 0.5(\eta_{max} - \eta_{min}) \left( 1 + \cos \left( \frac{t}{T} \pi \right) \right) \quad (7)$$

475 where:

476  $\eta_t$  is the learning rate at time step  $t$ ,

477  $\eta_{max}$  and  $\eta_{min}$  are the minimum and maximum learning rates, and

478  $T$  is the schedule's total number of time steps (epochs).

479

480 To optimise the training of the NVIDIA<sup>®</sup> Tesla<sup>®</sup> P100 graphics processing unit (GPU) used in  
481 Kaggle, PyTorch's automatic mixed precision (AMP) was implemented to train in mixed  
482 precision. It is a technique where half of the computations are performed in a 16-bit floating-  
483 point format, whereas the other half are performed in a 32-bit floating-point format. The  
484 gradients are calculated in the FP16 format for the sake of optimisation, while the master  
485 weights are stored in the FP32 format for the sake of numerical accuracy.

486

487 For this, gradient scaling was used to deal with the differences between FP16 and FP32.

488 Gradient scaling is the process of scaling the gradients by a specific factor to prevent the  
489 gradients from being too small (and thus causing underflow) or too large (which will cause

490 overflow). This scaling assists in controlling the training process, especially for deep networks  
491 with numerous parameters to be estimated.

492

493 The training of the ConvNeXt V2 Remod model was performed for ten epochs, with the  
494 learning rate being adjusted in a way that aims at deriving the highest performance. The model  
495 was trained with high performance and reliability using mixed precision through automatic  
496 mixed precision and with the help of checkpointing. Thus, the optimisation strategies and the  
497 advanced architectural features helped to enhance the recognition of malaria parasites in blood  
498 smear images at the end of the training process.

499

## 500 2.5 Model Development

501

### 502 2.5.1 Transfer learning

503

504 This work applied transfer learning, where pre-trained models were obtained from GitHub  
505 repositories. Transfer learning offered several advantages as it significantly cut down training  
506 time. As the models had previously been trained on large datasets such as ImageNet, the  
507 computational power and time needed for fine-tuning the models for malaria classification  
508 were considerably lower than that required for training new models. Secondly, transfer learning  
509 played a role in reducing overfitting, which is a big problem when dealing with limited samples.  
510 Through pre-training, the models with a large set of images, continued to perform well on the  
511 malaria classification task due to their generalisation ability.

512

513 In addition, transfer learning was used to ensure the models' accuracy and robustness were not  
514 compromised by the new task of distinguishing between parasitised and uninfected blood

515 smears since the models could still rely on their prior experience with identifying general  
516 objects in images (57). This approach was instrumental in resource-limited settings where  
517 access to vast amounts of labelled data and powerful computing resources is limited.

518

519 Swin Transformers, ResNet 18, ResNet 50, ConvNeXt Tiny and ConvNeXt V2 Tiny were the  
520 models employed in this study, all pre-trained on large datasets of generic images. There are  
521 several benefits of using these pre-trained models; first, they are already equipped with feature  
522 extraction capabilities that can be fine-tuned for a specific task, for instance, malaria parasite  
523 detection in microscopic blood smear images (58-60).

524

525 The pre-trained Swin Transformer models were acquired from the repository managed by  
526 Microsoft and are accessible at (61). Swin Transformers are well-suited for handling high-  
527 resolution images due to their unique mechanism of dividing images into non-overlapping  
528 windows, enabling efficient computation of self-attention within each window (43, 62). This  
529 approach makes it possible for the model to learn both the image's local and global features,  
530 which is very important during the classification, especially in tasks such as parasite  
531 identification.

532

533 ConvNeXt and ConvNeXt V2 models used in this work were obtained from the public  
534 repositories established by Facebook AI Research. ConvNeXt models can be accessed at (63).  
535 They represent advancements over regular convolutional neural networks (CNNs) with  
536 features derived from Vision Transformer architectures (8, 49). ConvNeXt V2, accessible at  
537 (64), incorporates improvements that include better resource management and improved  
538 feature extraction and, hence, is even more suitable for tasks such as malaria classification (50).

539

540 These models were first pre-trained on ImageNet, one of the most commonly used datasets in  
541 the computer vision field (65). The ImageNet dataset is one of the most extensive, with over  
542 14 million labelled images spanning 1,000 categories of objects, including animals, buildings,  
543 nature, and food, amongst others (66). This large amount of data helps these models to learn  
544 the features well. Hence, they are ideal for transfer learning applications, such as detecting  
545 malaria parasites with limited datasets.

546

547 Fine-tuning these models for classifying parasitised and uninfected blood smears involved  
548 adjusting the final fully connected layers to output two classifications: The blood smears were  
549 either parasitised or uninfected (67). It is essential to replace the pre-trained models' last layers  
550 with new layers specifically designed for malaria parasite detection. While the pre-trained  
551 models are well-trained in the general characteristics of the images, such as edges, patterns,  
552 and textures, the final layers can be focused on learning the unique characteristics of the blood  
553 smears relevant to malaria diagnosis. In this case, the final layers were replaced with custom  
554 layers designed for binary classification, parasitised versus uninfected.

555

### 556 2.5.2 Training Procedure

557

558 The training process for this study was performed on Kaggle, which offered the use of  
559 NVIDIA® Tesla® P100 GPU. This is mainly because of the GPU's architecture and  
560 computational ability for deep learning. The Tesla® P100 is based on NVIDIA®'s Pascal  
561 architecture, includes 16GB of HBM2 memory and performs 10.6 TeraFLOPS in single-  
562 precision floating-point operations per second. Such a computational capability helped handle  
563 large image datasets used in this study without experiencing low speeds. The P100 had enough



564 memory to operate on large and high-resolution images so that batch processing of models  
565 could be performed faster during training.

566

567 The training was performed using mixed-precision training with the help of PyTorch's  
568 automatic mixed precision (AMP) (68). AMP is a technique which enables deep learning  
569 models to train faster and with less memory than standard training (68, 69). AMP works on  
570 some parts of the network. For instance, the convolutions are computed using 16-bit floats,  
571 while the rest of the model's weights and gradients are calculated using 32-bit floats to balance  
572 between speed and accuracy.

573

574 This technique also enhances the speed of training and optimisation of the GPU, especially the  
575 Tesla<sup>®</sup> P100, which performs operations on large datasets with great accuracy. Furthermore,  
576 the vanishing and exploding gradient issues that are evident when training deep networks with  
577 vast parameter spaces like ConvNeXt or Swin Transformer models are also solved by AMP.

578

579 Optimisation Strategy

580

581 This study opted to use the Adam optimiser, as shown in Table 3, which has been known to be  
582 efficient in adjusting the learning rate during training (70). Adam uses the benefits of AdaGrad  
583 and RMSProp optimisations involving gradient averages and second-order moments to adjust  
584 the model weights (53, 71). This is advantageous for Adam for handling the sparse gradients  
585 and noisy data, which are familiar with medical image data. The learning rate of the optimiser  
586 was set to 0.0001 for most models, including ConvNeXt Tiny, ResNet18, and ResNet50, due  
587 to its ability to fine-tune deep learning features, especially for medical imaging data that  
588 typically contain noise and sparse gradients (72). A low learning rate is essential to guarantee

589 that the model gives only small weight adjustments to make the best estimate without  
 590 overfitting highly sensitive models on the loss surface (73). For the ConvNeXt V2 Remod  
 591 model, a higher learning rate of 0.0005 was used alongside weight decay of 0.01 to improve  
 592 model generalisation (74).

593

594 Table 3: Hyperparameters used for fine-tuning different models

| Model             | Learning Rate | Batch Size | Optimiser | Weight Decay | Loss Function                              | Scheduler           | Epochs | Mixed Precision       |
|-------------------|---------------|------------|-----------|--------------|--------------------------------------------|---------------------|--------|-----------------------|
| ConvNeXt Tiny     | 0.0001        | 128        | AdamW     | Not Used     | Cross Entropy Loss                         | None                | 10     | GradScaler & autocast |
| Swin Transformer  | 0.0001        | 128        | Adam      | Not Used     | Cross Entropy Loss                         | StepLR              | 10     | GradScaler & autocast |
| ResNet18          | 0.0001        | 32         | Adam      | Not Used     | Cross Entropy Loss                         | None                | 10     | GradScaler & autocast |
| ResNet50          | 0.0001        | 128        | Adam      | Not Used     | Cross Entropy Loss                         | None                | 10     | GradScaler & autocast |
| ConvNeXt V2 Tiny  | 0.0001        | 128        | AdamW     | Not Used     | Cross Entropy Loss                         | None                | 10     | GradScaler & autocast |
| ConvNeXt V2 Remod | 0.0005        | 128        | AdamW     | 0.01         | Cross Entropy Loss (Label Smoothing = 0.1) | OneCycleLR (Cosine) | 10     | GradScaler & autocast |

595

596 The adaptive learning rate of Adam makes the model converge faster than the normal stochastic  
 597 gradient descent (SGD) (75). In this study, it was beneficial for large and elaborate models

598 such as ConvNeXt and Swin Transformer with many parameters. Adam allowed the model to  
599 automatically and adaptively set the learning rate for each parameter, which made the model  
600 optimise itself and increase the training process's convergence rate.

601

602 Gradient Scaling and Stability

603

604 Gradient scaling was used during the optimisation to avoid training process instabilities (76).

605 It is a method applied in mixed-precision training to prevent the gradients from becoming too

606 small (vanishing gradients) or too large (exploding gradients) (77). In large networks, such as

607 those used in this study, the parameter space is also significant, which can result in oscillations

608 during training. Applying gradient scaling before backpropagation helped avoid the potential

609 numerical precision problems common in deep learning models.

610

611 A learning rate scheduler was used to stabilise the training process during implementation. A

612 learning rate scheduler adjusts the learning rate during training according to the given

613 performance of a model (78, 79). In this case, the scheduler had a learning rate reduction of 0.1

614 every seven epochs if the validation loss did not decrease. This technique is very helpful in

615 preventing the model from becoming trapped in the local minima. When the validation loss

616 stalls, reducing the learning rate helps the optimiser fine-tune the model weights and allows

617 the model to perform better and converge. For ConvNeXt V2 Remod, a OneCycleLR (cosine)

618 scheduler was applied to balance fast convergence with the risk of overfitting

619

620 Loss Function: Cross-Entropy Loss

621

622 The loss function used for this study was the Cross-Entropy Loss function, which is most  
623 suitable for the binary classification of the malaria parasite cases (parasitised and uninfected  
624 red blood cells) (80). Cross-entropy loss measures how far the predicted class probabilities are  
625 from the actual class labels (81). It is more useful in classification as it penalises the predicted  
626 output that is not in line with the actual output. In the case of ConvNeXt V2 Remod, label  
627 smoothing was also applied to the cross-entropy loss to mitigate the effect of noisy labels and  
628 improve generalisation. In this work, the model was trained to predict the likelihood of a given  
629 blood smear image being parasitaemic. The output from the final layer in the model is a vector  
630 of predicted probabilities, which are compared to the actual class labels, and the weights of the  
631 model are updated to minimise this loss function known as Cross-Entropy Loss.

632

633 Mathematically, Cross-Entropy Loss is computed as:

634

$$Loss = - \sum_{i=1}^N [y_i \cdot \log(p_i) + (1 - y_i) \cdot \log(1 - p_i)] \quad (8)$$

635

636 where:

637 N is the number of samples,

638  $y_i$  is the true label (either 0 for uninfected or 1 for parasitised),

639  $p_i$  is the predicted probability for the corresponding class.

640

641 In this context, Cross-Entropy Loss, displayed in Equation 8, helps the model to give a high  
642 probability to the correct class and a low probability to the incorrect class (82). Since the dataset  
643 has equal parasitised and uninfected images, Cross-Entropy Loss prevents the model from  
644 leaning towards one class and produces equally good results.

645

## 646 2.6 Model Application and Deployment

647

648 To enhance the applicability of the trained ConvNeXt models, a web application was developed  
649 using Gradio to facilitate real-time identification of malaria parasites in blood smear images.  
650 The Python library Gradio designed application has an interface where users can upload blood  
651 smear images and receive real-time diagnoses in a limited resource environment. It is  
652 accessible at (83).

653

654 The application (app) was designed with two main functionalities: The proposed solution  
655 includes image classification using ensemble models and the explanation of the predictions  
656 using the LIME model (Local Interpretable Model-agnostic Explanations) and Llama 3.1 by  
657 Facebook Research (84-87).

658

659 The application presents novel contributions through the use of an ensemble of deep learning  
660 models (ConvNeXt Tiny and ConvNeXt V2) that help improve diagnosis performance and  
661 reliability. To do this, the app takes the average of these models' predictions by assigning  
662 weights to each of the models to make a more accurate determination on whether a blood smear  
663 is parasited or not. This ensemble approach outperforms the conventional single-model systems  
664 employed in medical diagnostics to provide a more accurate result, especially in the limited  
665 resource environment (88). Furthermore, the app employs mixed-precision training with the  
666 help of GradScaler, which ensures the high performance with the minimal consumption of  
667 resources, which will be beneficial for the areas with poor infrastructure.

668

669 One of the main aspects of the app is the explainability element, using LIME for visualisation  
670 and LLaMA for textual elaboration (87, 89). LIME gives out visual maps that demonstrate the

671 parts of the image which are used in making the decision, which helps in improving the  
672 explainability of the predictions to medical practitioners (89). LLaMA enables an additional  
673 step in explaining the results as it generates human-readable descriptions of the context and,  
674 therefore, helps interpret the machine's predictions (87). These explainability features together  
675 with efficiency in the use of resources make the Malaria Diagnosis App not only unique but  
676 also very useful for use in malaria endemic areas.

677

#### 678 2.6.1 Use of best performing models

679

680 The application combines the strengths of two fine-tuned models, namely ConvNeXt Tiny and  
681 ConvNeXt V2 Tiny Remod, through the ensemble method (90). This approach combines the  
682 prediction of the first model with the second model's prediction to make the final decision,  
683 increasing the overall reliability of the decision made (91). From the two models used in this  
684 study, ConvNeXt Tiny was purposely selected for its computation efficiency, which allows it  
685 to process images at high speed. At the same time, ConvNeXt V2 Tiny Remod was chosen  
686 because of its higher accuracy and precision, as highlighted in the comparative analysis.

687

688 Every image the user uploads is first processed through a pre-processing step, which includes  
689 resizing the image to 224 x 224 pixels and normalising the image using the mean and standard  
690 deviation of the malaria dataset. This check helps meet the conditions the trained models expect  
691 as input data. The image is then passed through both models, and the average output of the two  
692 models is computed. The final decision on whether a blood smear is parasitised or uninfected  
693 is based on the average of the two models presented in this work. This approach enhances the  
694 diagnostic performance and decreases the rates of false-positive results, thus making the  
695 diagnosis more accurate.

696

## 697 2.6.2 Model Explanation with LIME

698

699 To further enhance the transparency and interpretability of the malaria parasite detection  
700 models, the LIME (Local Interpretable Model-agnostic Explanations) algorithm was  
701 employed. LIME works by perturbing the input data - in this case, the blood smear images -  
702 and observing how the model's predictions change in response to these perturbations. The  
703 algorithm generates explanations by locally approximating the model's decision boundary and  
704 identifying the regions within the image that most influence the final classification. This  
705 process is precious for understanding deep learning models, often called "black boxes."

706

707 Mathematically, LIME can be understood as follows:

708

709 Using a kernel function, LIME approximates the complex model around the local region of the  
710 explained instance:  $\pi(x_0, x')$ .

711

712 LIME minimises the following loss function to generate explanations:

713

$$\xi(x) = \underset{g \in G}{\operatorname{argmin}} \mathcal{L}(f, g, \pi_x) + \Omega(g) \quad (9)$$

714 where:

715  $\xi(x)$  is the explanation for the instance  $x$ ,

716  $G$  is the class of interpretable models,  $\mathcal{L}(f, g, \pi_x)$ , in Equation 9, is the loss function that

717 measures the fidelity of the interpretable model  $g$  to the complex model  $f$  in the local region

718 defined by the kernel  $\pi_x$ .

719 Omega(g) is a complexity term that penalises the complexity of the interpretable model g,  
720 ensuring that the explanation remains simple and human-readable.

721

722 The kernel function  $\Pi(x_0, x')$  assigns higher weights to perturbed samples closer to the original  
723 instance  $x_0$  ensuring that the explanation focuses on the local behaviour of the model. In the  
724 case of image classification, this kernel function is often defined based on the Euclidean  
725 distance between the perturbed image  $x'$  and the original image  $x_0$ .

726

727 Once the simpler model  $g(x)$  is trained to highlight the regions in the image most responsible  
728 for the model's prediction. These highlighted regions correspond to the image features—such  
729 as ring-shaped structures or abnormal cell morphologies that the model associates with malaria  
730 parasites.

731

732 For each blood smear image analysed, LIME produces a visual heatmap highlighting the most  
733 influential regions in the classification decision. These highlighted areas allow healthcare  
734 professionals to understand why the model classified an image as parasitised or uninfected.  
735 This feature is crucial in clinical settings because it provides clinicians with tangible visual  
736 cues to validate the model's predictions. It bridges the gap between complex machine learning  
737 models and human interpretability, making AI-driven diagnostic systems more transparent and  
738 trustworthy.

739

740 By offering healthcare professionals clear, visual evidence of what the model “sees,” LIME  
741 enhances decision-making support. Physicians and laboratory technicians are given the output  
742 of the model and the rationale behind the decision, building trust in the diagnostic process.



743 Moreover, the mathematical framework behind LIME ensures that the explanations are robust  
744 and focused on the most significant aspects of the model's behaviour.

745

### 746 2.6.3 Integration with LLaMA for Diagnostic Insights

747

748 The above outputs were complemented with textual descriptions produced by the Large  
749 Language Model Meta AI (LLaMA) language model to provide more specific case information  
750 (87). It enabled the app to classify blood smear images and briefly describe each classification  
751 based on context. An advantage of the system was that it used a pre-trained LLaMA model to  
752 provide interpretations in simple language of why a particular classification of the image as  
753 parasitised or uninfected was made.

754

755 In the case of blood smears classified as parasitised, the LLaMA model offered some  
756 understanding of the visual cues that contributed to this classification. It also showed the  
757 presence of trophozoites, the asexual form of malaria parasite presenting as ring-shaped  
758 structures within red blood cells and some other abnormalities, including irregular shapes of  
759 the red blood cells. When these features were identified by the ConvNeXt models, they marked  
760 a critical point in signalling an infection, which LLaMA translated into a layman's  
761 understanding.

762

763 The use of natural language processing in combination with machine learning algorithms has  
764 its advantages in clinical settings as it helps make the results more understandable. This way,  
765 the system expands the original AI's predictions with natural language descriptions to fulfil the  
766 requirements of healthcare workers. Extending the ability to justify the prediction made by the  
767 model helps enhance the credibility of the model's predictions. It enables the clinician to act

768 on the insights provided by the AI system more effectively. Ultimately, this integration makes  
769 the system more practically beneficial for diagnostic pipelines.

770

#### 771 2.6.4 Deployment

772

773 To develop the application, a Gradio interface with a well-organised and easily navigable  
774 layout was employed to facilitate the uploading of microscopic blood smear images with the  
775 subsequent immediate diagnostic output. When an image is uploaded, the system processes the  
776 image through a pre-processing, classification, and explanation phase. The results are presented  
777 to the user in both textual and graphical formats. It also builds on the features of Gradio's  
778 interface that enhance the interaction, especially for individuals who may not be quite  
779 conversant with the software. After the image has been uploaded, the fine-tuned ConvNeXt  
780 models are applied to the image, and the output is either parasitised or uninfected. In addition,  
781 a LIME model visualises the image regions that led to the classification decision.

782

783 The additional textual explanation that LLaMA can help practitioners understand the outcomes  
784 more straightforwardly. This dual output, which is both visual and textual, significantly  
785 improves the understandability of the AI-based differential diagnosis. For this reason, the app  
786 has a supporting backend script that controls memory usage, especially in environments with  
787 constrained resources. It is the same whether the code runs on a GPU for fast computations or  
788 a CPU in less powerful environments; the app backend is designed to be non-memory bound.

789

790 This design helps the app work effectively even in regions with limited resources, which is  
791 typical for malaria-endemic areas. Since the app was developed based on Gradio, it has a high  
792 level of adaptability. It can be adapted for mobile versions or integrated into existing healthcare

793 systems. This portability is especially valuable in malaria-endemic areas where portable  
794 diagnostic tools are crucial for front-line healthcare providers. With this app accessible online,  
795 installed on mobile devices or in healthcare systems of a specific region, the lack of time and  
796 AI in detecting malaria becomes relative, thus increasing the chances of curing patients in areas  
797 where malaria still needs to be solved.

798

### 799 **3. Results**

800

801 In this study, deep learning has been widely used for malaria parasite detection, and many  
802 evaluation metrics have been used to assess the performance of the models in each of the  
803 classification tasks. To evaluate the performance of the selected models such as Swin Tiny,  
804 ResNet18, ResNet50, ConvNeXt Tiny, ConvNeXt V2 Tiny and a re-modified version of  
805 ConvNeXt V2 Tiny, various criteria were used. These metrics are accuracy, precision, recall,  
806 F1 score and ROC-AUC (Receiver Operating Characteristic – Area Under the Curve). Relative  
807 measures, including log loss, MCC, specificity, balanced accuracy, Cohen’s kappa, G-mean,  
808 FPR and FNR, were also used to assess the discriminative ability of the models between  
809 parasitised and uninfected blood smears.

810

811 The basic measure is accuracy, in Equation 10, and is calculated as the number of correctly  
812 classified observations divided by the total observations. Mathematically, accuracy can be  
813 expressed as:

$$Accuracy = \frac{TP + TN}{TP + TN + FP + FN} \quad (10)$$

814 The symbols used are TP for True Positives, TN for True Negatives, FP for False Positives and  
815 FN for False Negatives. Since the dataset used in this study was balanced, accuracy is a good

816 measure to use, although it may not be the best measure for imbalanced data. Both precision  
817 and recall, thus, give a more detailed picture.

818

819 Precision or Positive Predictive Value, shown in Equation 11, is the probability that a positive  
820 identification is correct. It is calculated as:

$$Precision = \frac{TP}{TP + FP} \quad (11)$$

821 Precision is crucial when false positives are to be avoided, for example, in a diagnosis where a  
822 wrong result can mean a patient is subjected to a treatment he does not need.

823

824 Recall, or Sensitivity, is the ability to find all the positives out of the cases that are in fact  
825 positive. It is calculated as:

$$Recall = \frac{TP}{TP + FN} \quad (12)$$

826 A high recall rate, calculated as shown in Equation 12, means that the model accurately predicts  
827 most of the positives, which is especially important for tasks that involve risk, such as  
828 diagnosing malaria, when failure to identify a positive case (false negative) may have severe  
829 outcomes.

830

831 The F1 score, in Equation 13, integrates precision and recall into a single score that considers  
832 both of them equally profitable or unprofitable. The F1 score is defined as the harmonic mean  
833 of precision and recall:

$$F1 = 2 \times \frac{Precision \times Recall}{Precision + Recall} \quad (13)$$

834 This metric gives us a more holistic picture of the model's performance when it needs to  
835 balance trade-offs between precision and recall.

836

837 The ROC-AUC was also considered in this study, as shown in Equation 14. The true positive  
838 rate (TPR) is plotted against the false positive rate (FPR), giving the ROC curve, which  
839 graphically represents how the model is discriminatory. This performance is summarised by  
840 the AUC (Area Under the Curve) where the AUC score of 1 represents perfect discrimination  
841 and of 0.5 represents no discrimination. The AUC can be mathematically expressed as:

$$ROC - AUC = \int_0^1 TPR(FPR)d(FPR) \quad (14)$$

842 A particularly useful metric for model performance in medical diagnostics is ROC AUC, whose  
843 purpose is to evaluate model performance across different thresholds and, thereby, across a  
844 range of decision boundaries.

845

846 Furthermore, uncertainty of predictions was measured using log loss, in Equation 15. This  
847 metric is a rigorous metric because it penalises confident incorrect predictions more heavily  
848 than less confident ones. Mathematically, it is defined as:

$$Log\ loss = -\frac{1}{N} \sum_{i=1}^N [y_i \log(p_i) + (1 - y_i) \log(1 - p_i)] \quad (15)$$

849 where  $y_i$  is the actual label and  $p_i$  is the predicted probability for the positive class.

850

851 Quality of binary classifications was measured using Matthews correlation coefficient (referred  
852 to as MCC), given as Equation 16. It covers all four confusion matrix categories (TP, TN, FP,  
853 FN) and works well in imbalanced dataset cases, even though, the dataset used in this particular  
854 case was balanced. MCC is calculated as:

$$MCC = \frac{TP \times TN - FP \times FN}{\sqrt{(TP + FP)(TN + FP)(TP + FN)}} \quad (16)$$

855 True Negative Rate, OR Specificity, is the number of actual negatives identified as negatives.

856 Recall addresses positive cases, and it is complemented by it. Agreement between the model's

857 predictions and true labels were also measured using Cohen's kappa, refined by chance, and  
858 G-mean that is a geometric mean of sensitivity and specificity.

859

860 Moreover, using both False Positive Rate (FPR), in Equation 17, and False Negative Rate  
861 (FNR), in Equation 18, gives additional information about what type of errors the models made.

862 FPR, calculated as:

$$FPR = \frac{FP}{FP + TN} \quad (17)$$

863 indicates how often the model incorrectly labels uninfected images as parasitised, whereas

864 FNR, calculated as:

$$FNR = \frac{FN}{FN + TP} \quad (18)$$

865 reflects how often the model fails to detect actual parasitic infections.

866

867 Every metric has its advantages and disadvantages. For instance, while accuracy is easy to  
868 understand and calculate, it can be misleading with imbalanced datasets, though that was not  
869 an issue in the dataset used in this study. Precision is relevant in situations with the least  
870 tolerance for error in predictions. At the same time, recall is important in situations requiring  
871 detecting as many positive cases as possible. The advantage of the F1 score is that it is a  
872 balanced metric, but it can be less useful when precision and recall are much different. ROC-  
873 AUC is a robust measure in different thresholds. However, it can be sensitive to the presence  
874 of imbalanced data; this was not a problem in this work. The log loss ensures a model is not  
875 overconfident in its predictions, and MCC provides a more complementary score for  
876 performance, especially when dealing with imbalanced datasets. FNR and G-mean increase the  
877 understanding of the model's failure modes. Tables 4.1, 4.2 and 4.3 present model performance  
878 comparisons across these critical metrics.

879

880 Table 4.1: Model performance comparison across critical metrics

| Model                     | Accuracy | Precision | Recall   | F1 Score | ROC-AUC  |
|---------------------------|----------|-----------|----------|----------|----------|
| Swin Tiny                 | 0.613988 | 0.572842  | 0.896420 | 0.699000 | 0.679830 |
| ResNet18                  | 0.625687 | 0.572930  | 0.987379 | 0.725112 | 0.839727 |
| ResNet50                  | 0.813671 | 0.731378  | 0.991502 | 0.841803 | 0.951111 |
| ConvNeXt<br>Tiny          | 0.958646 | 0.944025  | 0.975110 | 0.959316 | 0.991124 |
| ConvNeXt V2<br>Tiny       | 0.544330 | 0.523228  | 0.998578 | 0.686663 | 0.815418 |
| ConvNeXt V2<br>Tiny Remod | 0.981249 | 0.979453  | 0.983123 | 0.981285 | 0.996633 |

881

882 Table 4.2: Model performance comparison across critical metrics

| Model                     | Log Loss | MCC      | Specificity | Balanced Accuracy |
|---------------------------|----------|----------|-------------|-------------------|
| Swin Tiny                 | 1.402099 | 0.276272 | 0.331555    | 0.613988          |
| ResNet18                  | 1.681094 | 0.364074 | 0.263995    | 0.625687          |
| ResNet50                  | 0.831209 | 0.671230 | 0.635839    | 0.813671          |
| ConvNeXt Tiny             | 0.116142 | 0.917790 | 0.942181    | 0.958646          |
| ConvNeXt V2<br>Tiny       | 2.224143 | 0.212159 | 0.090081    | 0.544330          |
| ConvNeXt V2<br>Tiny Remod | 0.099783 | 0.962506 | 0.979376    | 0.981249          |

883

884 Table 4.3: Model performance comparison across critical metrics

| <b>Model</b>              | <b>Cohen's<br/>Kappa</b> | <b>G-Mean</b> | <b>FPR</b> | <b>FNR</b> |
|---------------------------|--------------------------|---------------|------------|------------|
| Swin Tiny                 | 0.227975                 | 0.545172      | 0.668445   | 0.103580   |
| ResNet18                  | 0.251374                 | 0.510552      | 0.736005   | 0.012621   |
| ResNet50                  | 0.627341                 | 0.794000      | 0.364161   | 0.008498   |
| ConvNeXt Tiny             | 0.917292                 | 0.958505      | 0.057819   | 0.024890   |
| ConvNeXt V2<br>Tiny       | 0.088659                 | 0.299922      | 0.909919   | 0.001422   |
| ConvNeXt V2<br>Tiny Remod | 0.962499                 | 0.981248      | 0.020624   | 0.016877   |

885

886 The ConvNeXt models, especially the ConvNeXt V2 Tiny Remod, were highly able to  
887 differentiate between parasitised and uninfected samples with an accuracy of 98.1%, as shown  
888 in Table 4.1. This means the model can differentiate between malaria and other samples with  
889 high accuracy and low chances of misclassification, making it suitable for real-world  
890 applications. However, in the case of the Swin Tiny model, the accuracy was relatively low,  
891 standing at 61.4%, significantly indicating some discrepancies in the classification when  
892 differentiating between the two types of samples, which may raise a question regarding its  
893 practicability for real-time diagnosis.

894

895 Another critical factor in measuring the models' performance is their capability to minimise  
896 the number of false positives. Here, the accuracy of the ConvNeXt V2 Tiny Remod was  
897 impressive, with a precision of 97.9%, as shown in Table 4.1. This high precision shows that  
898 the model made only a few mistakes when identifying parasitised samples, thus reducing the  
899 possibility of unnecessary treatment for unparasitised ones. On the other hand, the precision of



900 Swin Tiny stands at 57.3%, which is an indication of the model's propensity to classify healthy  
901 samples as infected ones. Such high false positive readings can result in mistreating patients  
902 and unnecessary procedures in a clinical context.

903

904 The ability of the model to correctly predict actual malaria cases is also important, as measured  
905 by recall. ConvNeXt V2 Tiny Remod had a strong recall, achieving 98.3% in this task. A recall  
906 of 98.3% means that the model failed to identify only 1.7% of the parasitised cases, which  
907 shows that the model has high sensitivity in detecting malaria-infected blood smear image.  
908 Nevertheless, a higher recall of 89.6% was observed from Swin Tiny, which shows that the  
909 model correctly identified a large number of parasitised samples; however, it also had a low  
910 precision, meaning that Swin Tiny often misclassified uninfected samples as parasitised.

911

912 The F1 score, which incorporates the trade-off between precision and recall, also confirmed  
913 the superiority of ConvNeXt V2 Tiny Remod with a score of 98.1%. This balance shows the  
914 model's general performance in the classification task; the model could classify most positive  
915 cases without classifying many as negative. On the same note, the F1 score of Swin Tiny at  
916 69.9% indicates the model's inability to balance between detecting true positives and  
917 minimising false positives ideally, thus being less suitable for the fine-tuning task of malaria  
918 detection.

919

920 The accuracy and precision of the ConvNeXt models are not the only factors that make them  
921 stand out. The ROC-AUC value of the model that quantifies how well the model can  
922 differentiate parasitised and uninfected samples was 0.996 for ConvNeXt V2 Tiny Remod.  
923 This high value points to the model being well-equipped to distinguish between the two  
924 categories. However, the ROC-AUC of 0.679 for Swin Tiny shows that it did not perform well

925 in this regard, which reaffirms the previous observation that it was not quite adept at making  
926 the correct classifications.

927

928 In terms of confidence in the predictions of the model, the ConvNeXt V2 Tiny Remod was  
929 once more the best amongst the models, with a low log loss of 0.099. This low score suggests  
930 that the model made highly certain decisions, thus limiting the chances of misdiagnosis to the  
931 minimum. On the other end of the spectrum, with a log loss of 1.40, the Swin Tiny failed to  
932 distinguish between parasitised and uninfected image classes, thus playing into its subpar  
933 performance.

934

935 Additionally, ConvNeXt V2 Tiny Remod fared well in the MCC with a score of 0.962, which  
936 measures the overall performance of a model for both false positives and false negatives. This  
937 score enhances the credibility of the model in consistently producing accurate outcomes. Swin  
938 Tiny's MCC was also relatively poor at 0.276, indicating that it was unreliable and had a high  
939 level of variability in classifying the samples. This was especially seen in the model's  
940 specificity, which did not produce many false positive results. Based on the results, ConvNeXt  
941 V2 Tiny Remod had a specificity of 97.9%. Thus, it rarely offered false positive classifications  
942 of uninfected samples as parasitised, which is essential to avoid unnecessary treatments for  
943 patients who do not have the disease.

944

945 The sensitivity for Swin Tiny was 33.2%, a lower value compared to the other algorithms; this  
946 can be attributed to the model's tendency to classify uninfected cells as parasitic, thus reducing  
947 the model's usefulness in clinical diagnosis. Regarding balanced accuracy, that is, the mean of  
948 recall and specificity, ConvNeXt V2 Tiny Remod occupies the leading position with a score of  
949 98.1%. This high value indicates the model's good performance on both the positive and

950 negative classes because it can distinguish between them and avoid over-prediction cases  
951 where it may erroneously predict the image as having parasites when it does not. This is  
952 because the balanced accuracy of Swin Tiny stands at a low 61.4%, which shows  
953 comprehensive inefficiency regarding balance.

954

955 The Cohen's kappa scores of the ConvNeXt models also showed that the models made almost  
956 accurate classifications of the images. The ConvNeXt V2 Tiny Remod achieved an accuracy  
957 of 0.962, which shows a high correlation with the true labels; on the other hand, Swin Tiny,  
958 with an accuracy of 0.228, shows a low correlation and is in line with the earlier findings that  
959 it performed poorly.

960

961 Considering G-Mean, a measure combining recall and specificity, ConvNeXt V2 Tiny Remod  
962 is the best, with a value of 0.981. This implies that the model could distinguish between the  
963 parasitised images and, at the same time, minimise over-prediction. For instance, Swin Tiny,  
964 with a G-Mean of 0.545, failed to strike this balance, affecting its performance.

965

966 These findings indicate that the ConvNeXt models are substantially better than the others for  
967 detecting malaria parasites in microscopic images, especially the ConvNeXt V2 Tiny Remod  
968 model. Such models provided high accuracy and precision and had low error rates, thus  
969 showing indications of suitability for practical use. Conversely, Swin Tiny could have been  
970 stronger in several aspects, limiting its capability to address this classification problem.

971

972 The heatmap in Figure 7 supports the tabulated results as they compare model performance  
973 across multiple metrics. Of all the models, ConvNeXt V2 Tiny Remod and ConvNeXt Tiny  
974 have the best accuracy, precision, recall, and F1 score, as well as low log loss, thereby proving

975 to be efficient in identifying parasitised and uninfected blood smears. This is supported by their  
976 high specificity and moderate sensitivity, which enhances their performance. Conversely, Swin  
977 Tiny and ConvNeXt V2 Tiny models show less stable results with lower precision and higher  
978 false positive rates, thus weaker classification capabilities. The general comparison indicates  
979 that ConvNeXt V2 Tiny Remod is the most viable model for malaria identification.

980

981 Figure 7: Heatmap of model performance metrics

982

983 This assessment further shows that the ConvNeXt models, especially the ConvNeXt V2 Tiny  
984 Remod, are more effective for malaria parasite detection in the blood smear slides. These  
985 models have high accuracy, precision, and balanced classification for medical imaging tasks  
986 and, therefore, have a great potential for enhancing diagnostic accuracy.

987

#### 988 **4. Discussion**

989

990 This study shows that ConvNeXt architecture has many benefits and helps identify malaria  
991 parasites in thin blood smear images. The architectural design of ConvNeXt for high-resolution  
992 images allows it to have detailed local information and overall contextual information in the  
993 images. This two-fold function is beneficial in tasks involving basic and comprehensive  
994 information, such as medical diagnosis, since the images' small details and overall picture must  
995 be analysed.

996

997 There are several reasons for the enhanced performance of ConvNeXt and, especially, the  
998 ConvNeXt V2 Tiny Remod model. First, the hierarchical feature extraction of the model can  
999 capture details of malaria parasites, including their shape, texture, and internal structure, while

1000 also capturing the general composition of the blood smear. This is very important in medical  
1001 imaging, where diagnosis accuracy may depend on the finer details based on the image  
1002 displayed.

1003

1004 Although this study's dataset was from Bangladesh and thus restricts the geographic  
1005 generalisability, data augmentation was applied to introduce variability. Future work should  
1006 include datasets from other regions with different malaria strains to improve the model's  
1007 robustness. Collectively, the model could be expanded through global collaborations to  
1008 improve its performance across different geographic contexts.

1009

1010 Another consideration for AI-based diagnostic systems is the possibility of bias arising from  
1011 geographically or demographically limited training data. The dataset of this study mainly  
1012 comprised blood smear images exclusively from Bangladesh. It raised issues with genetic  
1013 diversity biases, such as ethnic differences in blood types and malaria strains. There is the  
1014 potential that deploying the model in various regions or with different populations can affect  
1015 its performance. Future studies should use more diverse datasets collected from different parts  
1016 of the world, from different blood types, and different parasite strains to increase the  
1017 generalisability of the model and ameliorate this bias.

1018

1019 Transfer learning was employed in the development of models in order to enhance their  
1020 performance. The ImageNet dataset used to pre-train the models in this work provided them  
1021 with a good starting point for general visual features such as edges, textures and shapes. This  
1022 helped reduce the requirement for a large amount of annotated malaria data and improved the  
1023 learning on the task-specific dataset.

1024

1025 To increase the model's robustness to poor-quality images that are more likely to be  
1026 encountered in low-resource settings, the model was trained and tested on images with noise,  
1027 rotations, and varying brightness, using data augmentation techniques. Furthermore, using  
1028 many data augmentation techniques increased the model's generalisation capability. This  
1029 enhanced the model's stability and guaranteed that the model's performance could be optimal  
1030 in various practical situations.

1031

1032 However, these methods have some drawbacks which have been identified to affect their  
1033 effectiveness. A limitation is that these models require access to computational resources,  
1034 which may be scarce in some environments, particularly in resource-limited settings. Using  
1035 architectures such as Swin-transformers and ConvNeXt can be computationally intensive, and  
1036 this poses a challenge in practical applications where technology and infrastructure may be  
1037 inadequate. On the other hand, access to these methods as an online service, where the  
1038 computation can be deferred to reputable online platforms such as Amazon web services and  
1039 Google Cloud, can be used as an alternative to enable access regardless of locally used  
1040 computational resources (92-94).

1041

1042 While data augmentation and transfer learning could solve some problems, the problem of  
1043 dataset representativeness still exists. The balanced dataset used in this study may not  
1044 completely reflect the variability that can be potentially observed in real-world clinical settings,  
1045 like staining technique, sample quality, or parasite life cycle stages. Additionally, the  
1046 ConvNext models used in this study are the less advanced versions, ConvNext Tiny and  
1047 ConvNext V2 Tiny models, due to the unavailability of computational resources. Future work  
1048 can involve training more advanced models, such as ConvNext V2 XLarge, on more diverse  
1049 and large datasets to find a way to generalise better.

1050

1051 The results from this study reveal the ability of ConvNeXt models, particularly in relation to  
1052 the high recall and F1 scores that characterise these models and which are particularly useful  
1053 for identifying malaria parasites. However, the utilisation of transfer learning and augmentation  
1054 has drawbacks, including sensitivity to certain data distributions. This was somewhat offset by  
1055 incorporating regularisation techniques such as the dropout.

1056

1057 Furthermore, including a new malaria diagnostic application within this framework emphasises  
1058 the clinical significance of this study. The app builds upon ConvNeXt and incorporates  
1059 methods such as LIME to facilitate real-time explainable AI diagnosis to healthcare  
1060 professionals. This tool is especially useful in areas with a scarcity of specialists who are  
1061 usually required to administer some of these tests. However, the app's deployment might be  
1062 restricted by the requirement for considerable computing ability and constant connectivity to  
1063 the Internet, indicating more efficient field versions.

1064

1065 The ConvNeXt architecture shows clear clinical significance for malaria diagnosis in resource-  
1066 limited environments. In high-burden areas, manual microscopy based on traditional methods  
1067 is highly dependent upon skilled personnel and is prone to human error. An AI-based approach  
1068 using ConvNeXt models to solve malaria detection has been proposed. It is automated and  
1069 accurate in detecting malaria parasites and simultaneously tackles some of the key limitations  
1070 of traditional approaches.

1071

1072 Additionally, the high accuracy and precision of ConvNeXt V2 Tiny Remod (98% accurate)  
1073 demonstrate that deep learning-based systems are reliable for detecting malaria with accuracy  
1074 similar to expert-level diagnosis. Such reliability may significantly alleviate the diagnostic

1075 workload of high-volume clinics and facilitate speeding up the diagnostic process, offering  
1076 timely treatment and improving patient outcomes. Adding the layer of clinical significance to  
1077 explainable AI techniques like LIME (for visual explanations) allows healthcare professionals  
1078 to understand the AI model's decision-making process. This puts into place an interpretability  
1079 which builds trust with clinicians so that system outputs are both accurate and transparent.

1080

## 1081 **5. Conclusion**

1082

1083 Deep learning models, especially the ConvNeXt-based malaria detection models proposed in  
1084 this study, are promising for real-world application, especially in low-resource settings.  
1085 Malaria remains a major disease burden, especially in developing countries where there is a  
1086 shortage of expert clinicians and well-equipped laboratories. The ConvNeXt V2 Tiny Remod  
1087 model presented in this study with an accuracy of 98% presents an efficient method of  
1088 automating malaria diagnosis. The scientific rationale is that ConvNeXt can be used to identify  
1089 malaria parasites in blood smears because the architecture enables the model to capture detailed  
1090 and contextual information as a microscopist would while examining blood smears under a  
1091 microscope. This makes it very sensitive and specific in detection, which is vital in the early  
1092 stages and correct identification of the parasites.

1093

1094 Moreover, data augmentation and transfer learning are implemented in the model, which  
1095 improves the model's performance regardless of the imaging conditions. These models could  
1096 help decrease diagnostic errors, reduce the time to diagnosis, and enhance the clinical  
1097 management of malaria patients. The use of diagnostic services in mobile or edge devices also  
1098 presents a way of extending the services to regions without access to such services, thus  
1099 contributing to efforts to fight this global disease burden.



1100

## 1101 6. Bibliography

1102

- 1103 1. WHO. World malaria report 2021. Geneva: World Health Organization; 2021.
- 1104 2. Ullah H, Khan MI, Suleman NM, Ismail N, Khan Z, Sayyid G. A Review on Malarial  
1105 Parasite. World Journal of Zoology. 2015;10(4):285-90.
- 1106 3. Makler MT, Palmer CJ, Ager AL. A review of practical techniques for the diagnosis of  
1107 malaria. Annals of tropical medicine and parasitology. 1998;92(4):419-34.
- 1108 4. Ba EH, Baird JK, Barnwell J, Bell D, Carter J, Dhorda M, et al. Microscopy for the  
1109 detection, identification and quantification of malaria parasites on stained thick and thin blood  
1110 films in research settings: procedure: methods manual. 2015.
- 1111 5. Maturana CR, De Oliveira AD, Nadal S, Bilalli B, Serrat FZ, Soley ME, et al. Advances  
1112 and challenges in automated malaria diagnosis using digital microscopy imaging with artificial  
1113 intelligence tools: A review. Frontiers in microbiology. 2022;13:1006659.
- 1114 6. Yang R, Yu Y. Artificial convolutional neural network in object detection and semantic  
1115 segmentation for medical imaging analysis. Frontiers in oncology. 2021;11:638182.
- 1116 7. Sadek FM, Solihin MI, Heltha F, Hong LW, Rizon M. A Comparison of Machine  
1117 Learning and Deep Learning in Hyperspectral Image Classification. Enabling Industry 40  
1118 through Advances in Mechatronics: Selected Articles from iM3F 2021, Malaysia: Springer;  
1119 2022. p. 221-35.
- 1120 8. Liu Z, Mao H, Wu C-Y, Feichtenhofer C, Darrell T, Xie S, editors. A convnet for the  
1121 2020s. Proceedings of the IEEE/CVF conference on computer vision and pattern recognition;  
1122 2022.
- 1123 9. Todi A, Narula N, Sharma M, Gupta U, editors. ConvNext: A Contemporary  
1124 Architecture for Convolutional Neural Networks for Image Classification. 2023 3rd  
1125 International Conference on Innovative Sustainable Computational Technologies (CISCT);  
1126 2023: IEEE.
- 1127 10. Medicine NLo. NLM - Malaria Data. 2018.
- 1128 11. Yu H, Yang F, Rajaraman S, Ersoy I, Moallem G, Poostchi M, et al. Malaria Screener:  
1129 a smartphone application for automated malaria screening. BMC Infectious Diseases.  
1130 2020;20:1-8.
- 1131 12. Dablain D, Jacobson KN, Bellinger C, Roberts M, Chawla NV. Understanding CNN  
1132 fragility when learning with imbalanced data. Machine Learning. 2024;113(7):4785-810.
- 1133 13. Kumar T, Verma K. A Theory Based on Conversion of RGB image to Gray image.  
1134 International Journal of Computer Applications. 2010;7(2):7-10.
- 1135 14. Díaz G, Gonzalez F, Romero E, editors. Infected cell identification in thin blood images  
1136 based on color pixel classification: comparison and analysis. Progress in Pattern Recognition,  
1137 Image Analysis and Applications: 12th Iberoamericann Congress on Pattern Recognition,  
1138 CIARP 2007, Valparaiso, Chile, November 13-16, 2007 Proceedings 12; 2007: Springer.
- 1139 15. Fatima T, Farid MS. Automatic detection of Plasmodium parasites from microscopic  
1140 blood images. Journal of Parasitic Diseases. 2020;44(1):69-78.
- 1141 16. Hung Y-W, Wang C-L, Wang C-M, Chan Y-K, Tseng L-Y, Lee C-W, et al. Parasite  
1142 and infected-erythrocyte image segmentation in stained blood smears. Journal of Medical and  
1143 Biological Engineering. 2015;35:803-15.
- 1144 17. Bagui O, Zoueu J, Wählby C. Automatic malaria diagnosis by the use of multispectral  
1145 contrast imaging. Journal of Physical Chemical News. 2015;75:86-98.

- 1146 18. Sharma H, Jain S, Vasudeva A. Detection of Malarial Parasite in Blood using Image  
1147 Processing. 2023.
- 1148 19. Aksoy S, Demircioglu P, Bogrekci I. Enhancing Melanoma Diagnosis with Advanced  
1149 Deep Learning Models Focusing on Vision Transformer, Swin Transformer, and ConvNeXt.  
1150 Dermatopathology. 2024;11(3):239-52.
- 1151 20. Saponara S, Elhanashi A, editors. Impact of image resizing on deep learning detectors  
1152 for training time and model performance. International Conference on Applications in  
1153 Electronics Pervading Industry, Environment and Society; 2021: Springer.
- 1154 21. Moraes T, Amorim P, Da Silva JV, Pedrini H. Medical image interpolation based on  
1155 3D Lanczos filtering. Computer Methods in Biomechanics and Biomedical Engineering:  
1156 Imaging & Visualization. 2020;8(3):294-300.
- 1157 22. Magnusson A, Sandahl A. Artifact-Free Image Upscaling: An Evaluation of an  
1158 Artifact-Free Color Interpolation Algorithm with Respect to Visual Quality. 2022.
- 1159 23. Madhukar B, Narendra R, editors. Lanczos resampling for the digital processing of  
1160 remotely sensed images. Proceedings of International Conference on VLSI, Communication,  
1161 Advanced Devices, Signals & Systems and Networking (VCASAN-2013); 2013: Springer.
- 1162 24. Yaroslavsky L. Fast discrete sinc-interpolation: a gold standard for image resampling.  
1163 Advances in Signal Transforms: Theory and Applications. 2007;7:337-405.
- 1164 25. Bernstein GM, Gruen D. Resampling images in Fourier domain. Publications of the  
1165 Astronomical Society of the Pacific. 2014;126(937):287.
- 1166 26. Thévenaz P, Blu T, Unser M. Image interpolation and resampling. Handbook of  
1167 medical imaging, processing and analysis. 2000;1(1):393-420.
- 1168 27. Zhang C, Bengio S, Hardt M, Recht B, Vinyals O. Understanding deep learning (still)  
1169 requires rethinking generalization. Communications of the ACM. 2021;64(3):107-15.
- 1170 28. Zheng S, Song Y, Leung T, Goodfellow I, editors. Improving the robustness of deep  
1171 neural networks via stability training. Proceedings of the IEEE conference on computer vision  
1172 and pattern recognition; 2016.
- 1173 29. Rahman A, Zunair H, Rahman MS, Yuki JQ, Biswas S, Alam MA, et al. Improving  
1174 malaria parasite detection from red blood cell using deep convolutional neural networks. arXiv  
1175 preprint arXiv:190710418. 2019.
- 1176 30. Fayaz S, Ahmad Shah SZ, Gul N, Assad A. Advancements in Data Augmentation and  
1177 Transfer Learning: A Comprehensive Survey to Address Data Scarcity Challenges. Recent  
1178 Advances in Computer Science and Communications (Formerly: Recent Patents on Computer  
1179 Science). 2024;17(8):14-35.
- 1180 31. Mikołajczyk A, Grochowski M, editors. Data augmentation for improving deep  
1181 learning in image classification problem. 2018 international interdisciplinary PhD workshop  
1182 (IIPhDW); 2018: IEEE.
- 1183 32. Chandola Y, Uniyal V, Bachheti Y, Lakhera N, Rawat R. Data Augmentation  
1184 Techniques applied to Medical Images. International Journal of Research Publication and  
1185 Reviews. 2024;Vol 5, no 7:483-501.
- 1186 33. Shorten C, Khoshgoftaar TM. A survey on image data augmentation for deep learning.  
1187 Journal of big data. 2019;6(1):1-48.
- 1188 34. Hoorali F, Khosravi H, Moradi B. Automatic Bacillus anthracis bacteria detection and  
1189 segmentation in microscopic images using UNet++. Journal of Microbiological Methods.  
1190 2020;177:106056.
- 1191 35. Trung TQ, Bag A, Huyen LTN, Meeseepong M, Lee NE. Bio-Inspired Artificial  
1192 Retinas Based on a Fibrous Inorganic–Organic Heterostructure for Neuromorphic Vision.  
1193 Advanced Functional Materials. 2024;34(11):2309378.

- 1194 36. Shwetha V, Prasad K, Mukhopadhyay C, Banerjee B. Data augmentation for Gram-  
1195 stain images based on Vector Quantized Variational AutoEncoder. *Neurocomputing*.  
1196 2024;600:128123.
- 1197 37. Tiwari N, Omar M, Ghadi Y. Brain Tumor Classification From Magnetic Resonance  
1198 Imaging Using Deep Learning and Novel Data Augmentation. *Transformational Interventions*  
1199 *for Business, Technology, and Healthcare: IGI Global*; 2023. p. 392-413.
- 1200 38. Singh A, Bay A, Mirabile A. Assessing the importance of colours for cnns in object  
1201 recognition. *arXiv preprint arXiv:201206917*. 2020.
- 1202 39. Abdollahi B, Tomita N, Hassanpour S. Data augmentation in training deep learning  
1203 models for medical image analysis. *Deep learners and deep learner descriptors for medical*  
1204 *applications*. 2020:167-80.
- 1205 40. Chlap P, Min H, Vandenberg N, Dowling J, Holloway L, Haworth A. A review of  
1206 medical image data augmentation techniques for deep learning applications. *Journal of Medical*  
1207 *Imaging and Radiation Oncology*. 2021;65(5):545-63.
- 1208 41. Kim Y, Uddin AS, Bae S-H. Local augment: Utilizing local bias property of  
1209 convolutional neural networks for data augmentation. *IEEE Access*. 2021;9:15191-9.
- 1210 42. Zhao J, Lu D, Ma K, Zhang Y, Zheng Y, editors. Deep image clustering with category-  
1211 style representation. *Computer Vision–ECCV 2020: 16th European Conference, Glasgow, UK,*  
1212 *August 23–28, 2020, Proceedings, Part XIV 16*; 2020: Springer.
- 1213 43. Liu Z, Lin Y, Cao Y, Hu H, Wei Y, Zhang Z, et al. Swin Transformer: Hierarchical  
1214 Vision Transformer using Shifted Windows. *Conference: 2021 IEEE/CVF International*  
1215 *Conference on Computer Vision (ICCV)*; Montreal, QC, Canada: Institute of Electrical and  
1216 *Electronics Engineers (IEEE)*; 2021.
- 1217 44. Tang Y, Yang D, Li W, Roth HR, Landman B, Xu D, et al. Self-Supervised Pre-  
1218 Training of Swin Transformers for 3D Medical Image Analysis. *Conference: 2022 IEEE/CVF*  
1219 *Conference on Computer Vision and Pattern Recognition (CVPR)*; New Orleans,  
1220 Louisiana2022.
- 1221 45. Chen X, Qin Y, Xu W, Bur AM, Zhong C, Wang G, editors. Improving vision  
1222 transformers on small datasets by increasing input information density in frequency domain.  
1223 *IEEE/CVF International Conference on Computer Vision Workshops (ICCVW)*; 2022.
- 1224 46. He K, Zhang X, Ren S, Sun J, editors. Deep residual learning for image recognition.  
1225 *Proceedings of the IEEE conference on computer vision and pattern recognition*; 2016.
- 1226 47. Teow YJ. Malaria parasite detection from human blood smear images using deep  
1227 learning techniques: UTAR; 2023.
- 1228 48. Cheng W, Liu J, Wang C, Jiang R, Jiang M, Kong F. Application of image recognition  
1229 technology in pathological diagnosis of blood smears. *Clinical and Experimental Medicine*.  
1230 2024;24(1):181.
- 1231 49. Li J, Wang C, Huang B, Zhou Z. ConvNeXt-backbone HoVerNet for nuclei  
1232 segmentation and classification. *arXiv preprint arXiv:220213560*. 2022.
- 1233 50. Woo S, Debnath S, Hu R, Chen X, Liu Z, Kweon IS, et al., editors. Convnext v2: Co-  
1234 designing and scaling convnets with masked autoencoders. *Proceedings of the IEEE/CVF*  
1235 *Conference on Computer Vision and Pattern Recognition*; 2023.
- 1236 51. Müller R, Kornblith S, Hinton GE. When does label smoothing help? *Advances in*  
1237 *neural information processing systems*. 2019;32.
- 1238 52. Lukasik M, Bhojanapalli S, Menon A, Kumar S, editors. Does label smoothing mitigate  
1239 label noise? *International Conference on Machine Learning*; 2020: PMLR.
- 1240 53. Reyad M, Sarhan AM, Arafa M. A modified Adam algorithm for deep neural network  
1241 optimization. *Neural Computing and Applications*. 2023;35(23):17095-112.

- 1242 54. Chen X, Liang C, Huang D, Real E, Liu Y, Wang K, et al., editors. Evolved optimizer  
1243 for vision. First Conference on Automated Machine Learning (Late-Breaking Workshop);  
1244 2022.
- 1245 55. Meng LK, Xin LJ, Yi HH, Salam ZAA, Wei NB. A machine learning approach for face  
1246 mask detection system with AdamW optimizer. *J Appl Technol Innov.* 2023;7(3):25.
- 1247 56. Omidvar S, Tran T. Tackling cold-start with deep personalized transfer of user  
1248 preferences for cross-domain recommendation. *International Journal of Data Science and*  
1249 *Analytics.* 2023:1-10.
- 1250 57. Zhuang F, Qi Z, Duan K, Xi D, Zhu Y, Zhu H, et al. A comprehensive survey on transfer  
1251 learning. *Proceedings of the IEEE.* 2020;109(1):43-76.
- 1252 58. Weiss K, Khoshgoftaar TM, Wang D. A survey of transfer learning. *Journal of Big*  
1253 *data.* 2016;3:1-40.
- 1254 59. Raghu M, Zhang C, Kleinberg J, Bengio S. Transfusion: Understanding transfer  
1255 learning for medical imaging. *Advances in neural information processing systems.* 2019;32.
- 1256 60. Pan SJ, Yang Q. A survey on transfer learning. *IEEE Transactions on knowledge and*  
1257 *data engineering.* 2009;22(10):1345-59.
- 1258 61. Liu ZaL, Yutong and Cao, Yue and Hu, Han and Wei, Yixuan and Zhang, Zheng and  
1259 Lin, Stephen and Guo, Baining. Swin Transformer: Hierarchical Vision Transformer using  
1260 Shifted Windows *Proceedings of the IEEE/CVF International Conference on Computer Vision*  
1261 *(ICCV)2021* [  
1262 62. Han K, Wang Y, Chen H, Chen X, Guo J, Liu Z, et al. A survey on vision transformer.  
1263 *IEEE transactions on pattern analysis and machine intelligence.* 2022;45(1):87-110.
- 1264 63. Zhuang Liu HM, Chao-Yuan Wu, Christoph Feichtenhofer, Trevor Darrell, Saining  
1265 Xie. A ConvNet for the 2020s 2022 [Available from:  
1266 <https://github.com/facebookresearch/ConvNeXt?tab=readme-ov-file>.  
1267 64. Sanghyun Woo SD, Ronghang Hu, Xinlei Chen, Zhuang Liu, In So Kweon, Saining  
1268 Xie. ConvNeXt V2: Co-designing and Scaling ConvNets with Masked Autoencoders 2023  
1269 [Available from: <https://github.com/facebookresearch/ConvNeXt-V2>.  
1270 65. Marcelino P. Transfer learning from pre-trained models. *Towards data science.*  
1271 2018;10(330):23.
- 1272 66. Krizhevsky A, Sutskever I, Hinton GE. Imagenet classification with deep convolutional  
1273 neural networks. *Advances in neural information processing systems.* 2012;25.
- 1274 67. Montalbo FJP, Alon AS. Empirical analysis of a fine-tuned deep convolutional model  
1275 in classifying and detecting malaria parasites from blood smears. *KSII Transactions on Internet*  
1276 *and Information Systems (TIIS).* 2021;15(1):147-65.
- 1277 68. Dörrich M, Fan M, Kist AM. Impact of Mixed Precision Techniques on Training and  
1278 Inference Efficiency of Deep Neural Networks. *IEEE Access.* 2023;11:57627-34.
- 1279 69. Nokhwal S, Chilakalapudi P, Donekal P, Nokhwal S, Pahune S, Chaudhary A, editors.  
1280 *Accelerating neural network training: A brief review. Proceedings of the 2024 8th International*  
1281 *Conference on Intelligent Systems, Metaheuristics & Swarm Intelligence; 2024.*
- 1282 70. Kandel I, Castelli M, Popovič A. Comparative study of first order optimizers for image  
1283 classification using convolutional neural networks on histopathology images. *Journal of*  
1284 *imaging.* 2020;6(9):92.
- 1285 71. Okewu E, Misra S, Lius F-S, editors. Parameter tuning using adaptive moment  
1286 estimation in deep learning neural networks. *Computational Science and Its Applications–*  
1287 *ICCSA 2020: 20th International Conference, Cagliari, Italy, July 1–4, 2020, Proceedings, Part*  
1288 *VI 20; 2020: Springer.*
- 1289 72. Lee HH. Exploring Explainable Optimization in Medical Segmentation Network for  
1290 Multi-Scale Generalization With Anatomical Atlas: Vanderbilt University; 2023.
- 1291 73. LeCun Y, Bengio Y, Hinton G. Deep learning. *nature.* 2015;521(7553):436-44.



- 1292 74. Li S, Liu Z, Tian J, Wang G, Wang Z, Jin W, et al. Switch EMA: A Free Lunch for  
1293 Better Flatness and Sharpness. arXiv preprint arXiv:240209240. 2024.
- 1294 75. Pan Y, Li Y. Toward understanding why adam converges faster than sgd for  
1295 transformers. arXiv preprint arXiv:230600204. 2023.
- 1296 76. Horváth S, Mishchenko K, Richtárik P. Adaptive learning rates for faster stochastic  
1297 gradient methods. arXiv preprint arXiv:220805287. 2022.
- 1298 77. Zhao R, Vogel B, Ahmed T, Luk W, editors. Reducing underflow in mixed precision  
1299 training by gradient scaling. Proceedings of the Twenty-Ninth International Conference on  
1300 International Joint Conferences on Artificial Intelligence; 2021.
- 1301 78. Kim C, Kim S, Kim J, Lee D, Kim S. Automated learning rate scheduler for large-batch  
1302 training. arXiv preprint arXiv:210705855. 2021.
- 1303 79. Carvalho P, Lourenço N, Assunção F, Machado P, editors. Autolr: An evolutionary  
1304 approach to learning rate policies. Proceedings of the 2020 genetic and evolutionary  
1305 computation conference; 2020.
- 1306 80. Ruby U, Yendapalli V. Binary cross entropy with deep learning technique for image  
1307 classification. Int J Adv Trends Comput Sci Eng. 2020;9(10).
- 1308 81. Ho Y, Wookey S. The real-world-weight cross-entropy loss function: Modeling the  
1309 costs of mislabeling. IEEE access. 2019;8:4806-13.
- 1310 82. Wang Y, Ma X, Chen Z, Luo Y, Yi J, Bailey J, editors. Symmetric cross entropy for  
1311 robust learning with noisy labels. Proceedings of the IEEE/CVF international conference on  
1312 computer vision; 2019.
- 1313 83. Mmileng OP. Malaria Diagnosis App 1.0 Johannesburg2024 [Available from:  
1314 <https://huggingface.co/spaces/Phikhei/ConvNextMalariaDetector>].
- 1315 84. Garreau D, Luxburg U, editors. Explaining the explainer: A first theoretical analysis of  
1316 LIME. International conference on artificial intelligence and statistics; 2020: PMLR.
- 1317 85. Aldughayfiq B, Ashfaq F, Jhanjhi N, Humayun M. Explainable AI for retinoblastoma  
1318 diagnosis: interpreting deep learning models with LIME and SHAP. Diagnostics.  
1319 2023;13(11):1932.
- 1320 86. Dubey A, Jauhri A, Pandey A, Kadian A, Al-Dahle A, Letman A, et al. The llama 3  
1321 herd of models. arXiv preprint arXiv:240721783. 2024.
- 1322 87. Vavekanand R, Sam K. Llama 3.1: An In-Depth Analysis of the Next-Generation Large  
1323 Language Model. ResearchGate; 2024.
- 1324 88. Rane N, Choudhary SP, Rane J. Ensemble deep learning and machine learning:  
1325 applications, opportunities, challenges, and future directions. Studies in Medical and Health  
1326 Sciences. 2024;1(2):18-41.
- 1327 89. Huff DT, Weisman AJ, Jeraj R. Interpretation and visualization techniques for deep  
1328 learning models in medical imaging. Physics in Medicine & Biology. 2021;66(4):04TR1.
- 1329 90. Mahmood Y, Kama N, Azmi A, Ali M, editors. Improving estimation accuracy  
1330 prediction of software development effort: A proposed ensemble model. 2020 International  
1331 Conference on Electrical, Communication, and Computer Engineering (ICECCE); 2020: IEEE.
- 1332 91. Etemadi S, Khashei M. Accuracy versus reliability-based modelling approaches for  
1333 medical decision making. Computers in Biology and Medicine. 2022;141:105138.
- 1334 92. Li A, Yang X, Kandula S, Zhang M, editors. CloudCmp: comparing public cloud  
1335 providers. Proceedings of the 10th ACM SIGCOMM conference on Internet measurement;  
1336 2010.
- 1337 93. Srinivasan V, Ravi J, Raj J. Google Cloud Platform for Architects: Design and manage  
1338 powerful cloud solutions: Packt Publishing Ltd; 2018.
- 1339 94. Reese G. Cloud application architectures: building applications and infrastructure in the  
1340 cloud: " O'Reilly Media, Inc."; 2009.
- 1341

# ImageNet-1K Acc.

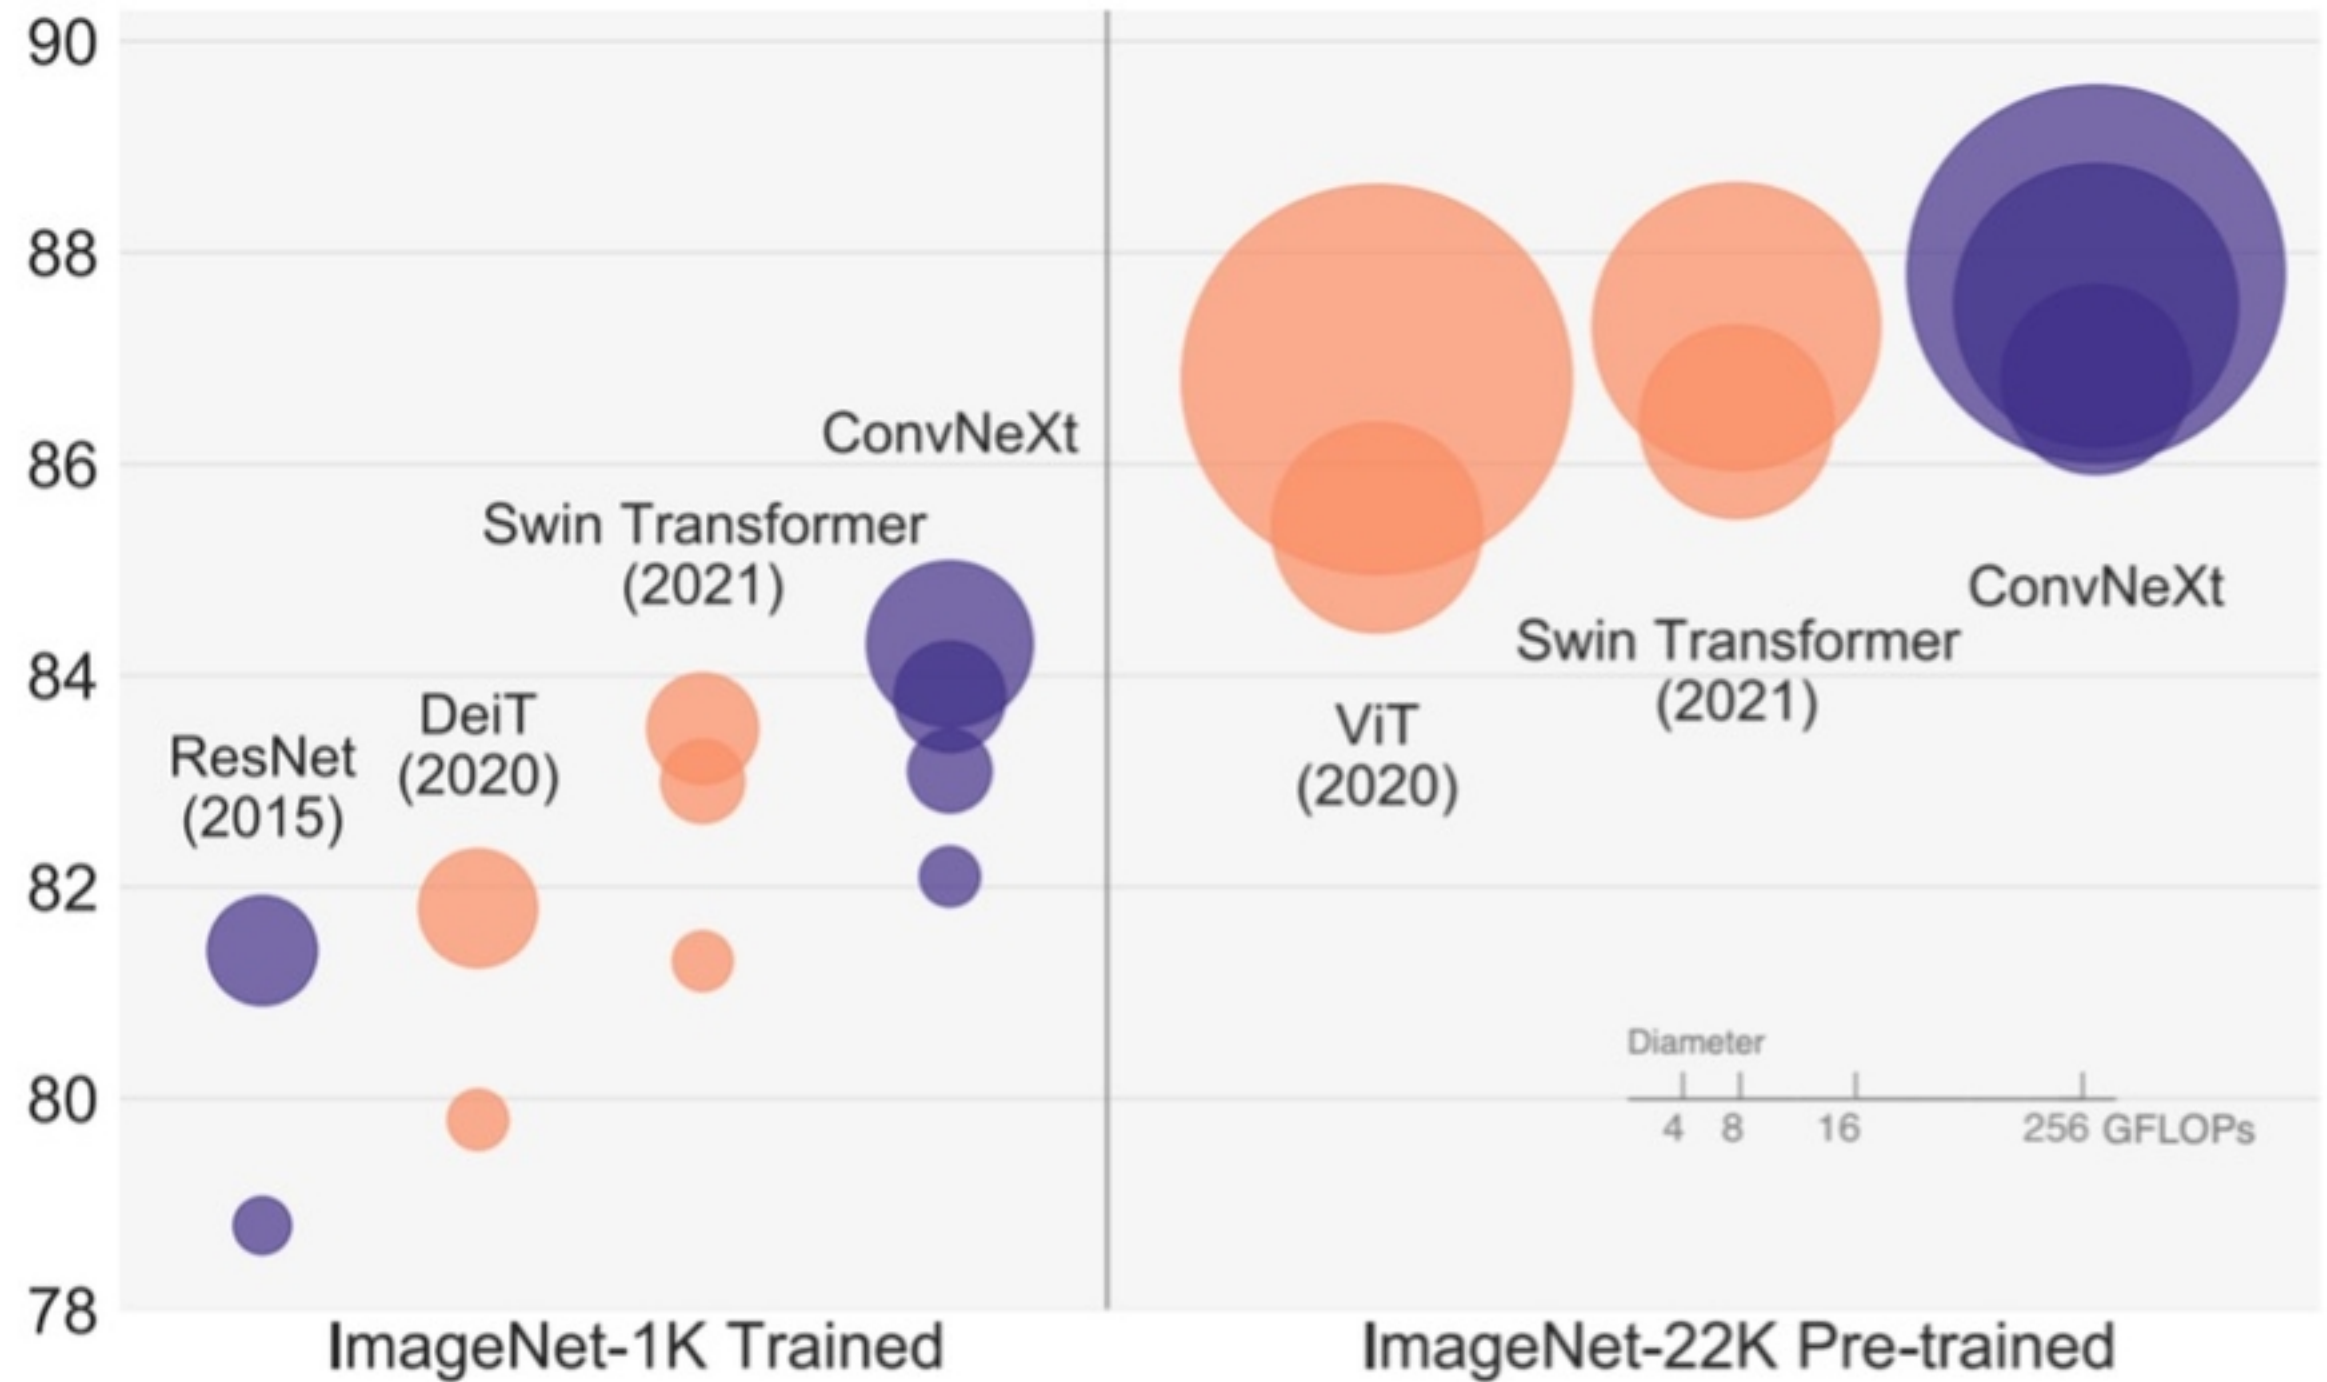

Figure

Image Count per Category

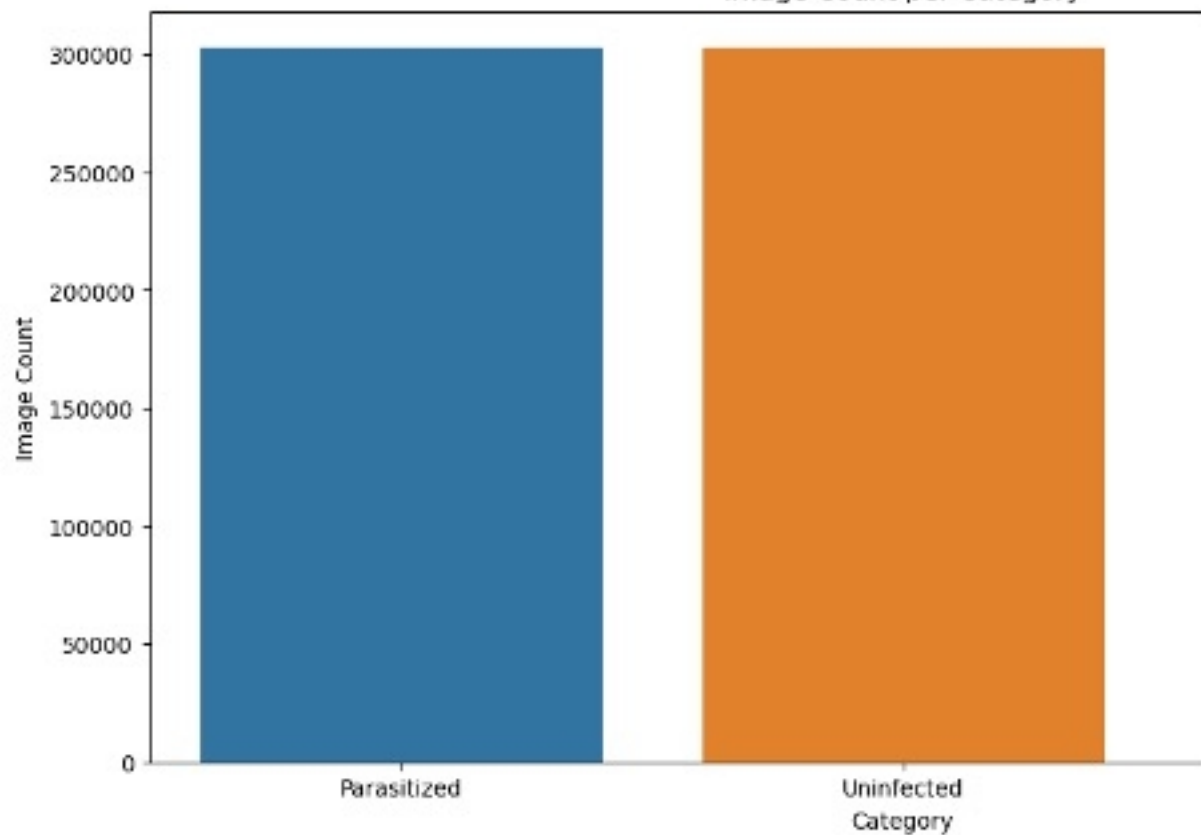

Figure

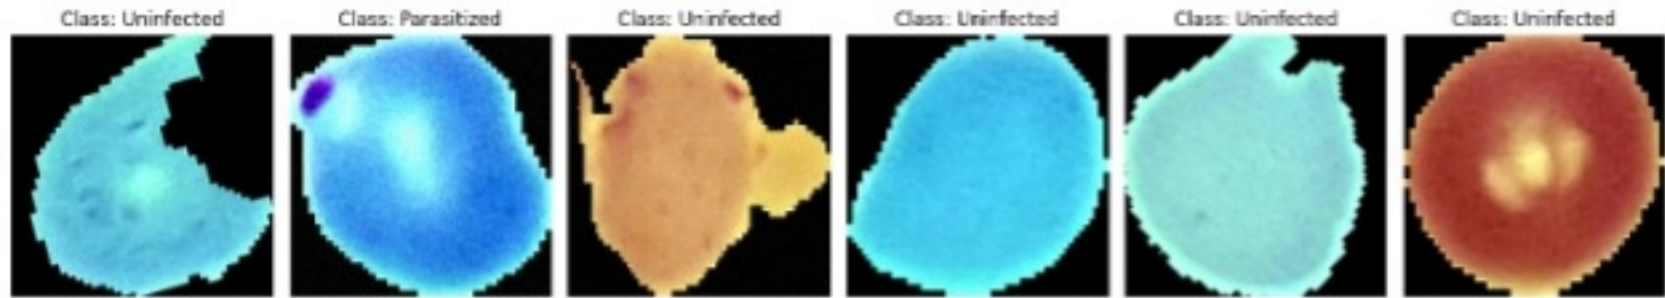

Figure



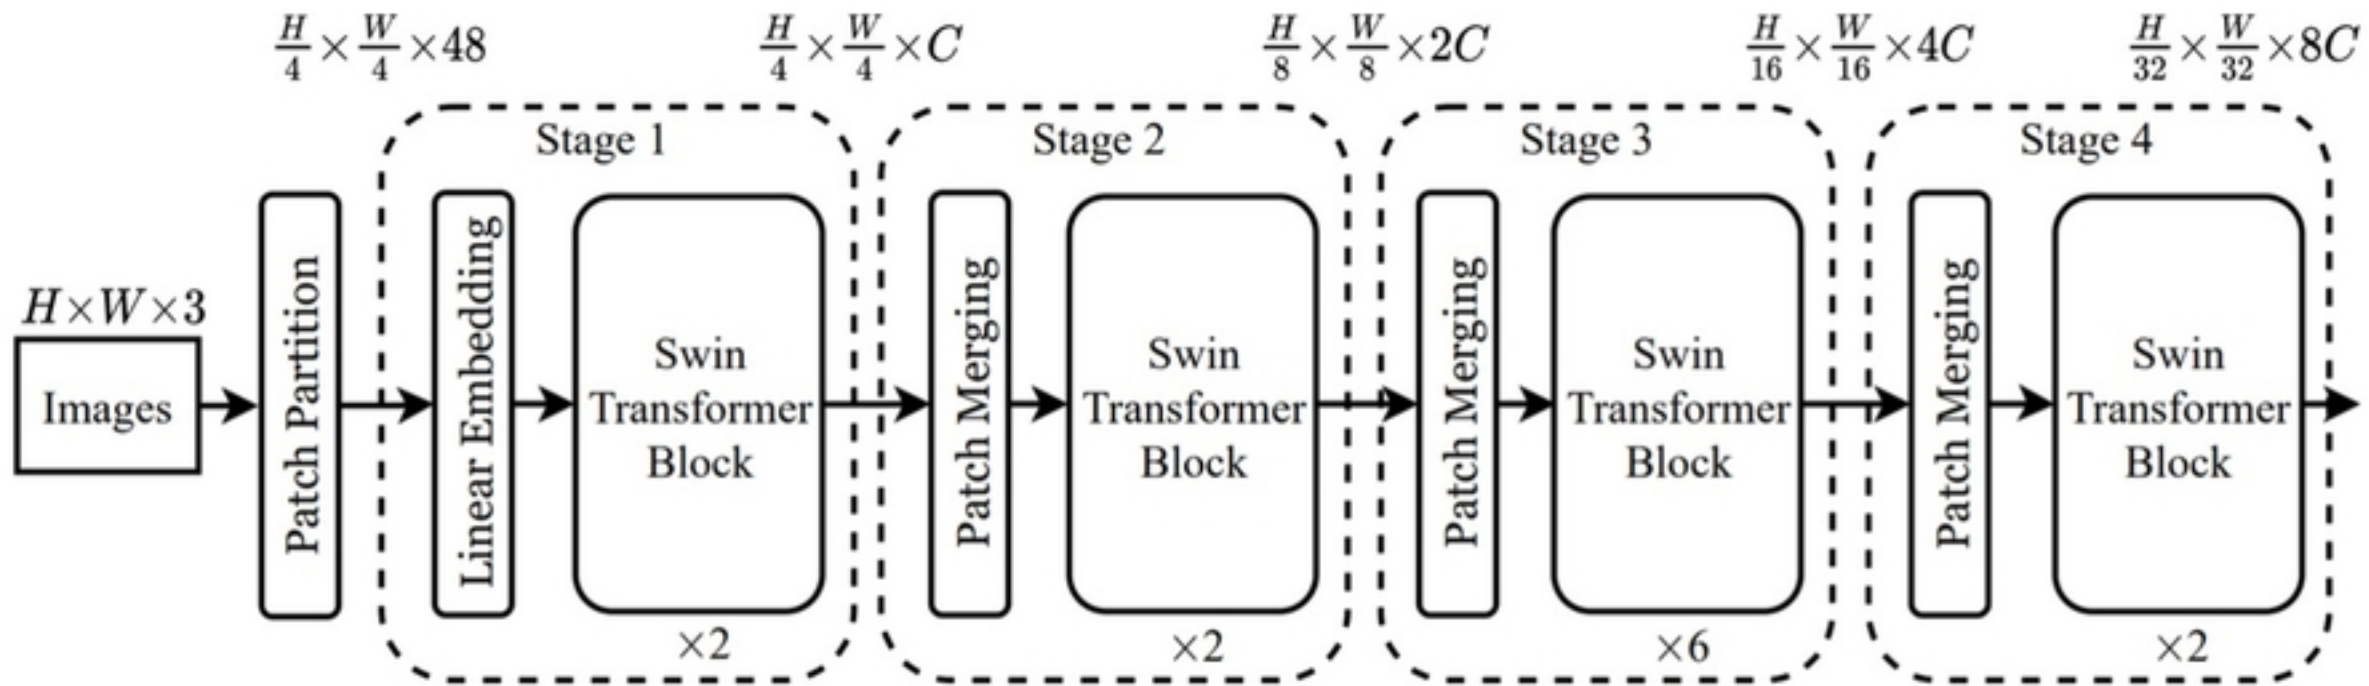

Figure

# Swin Transformer Block

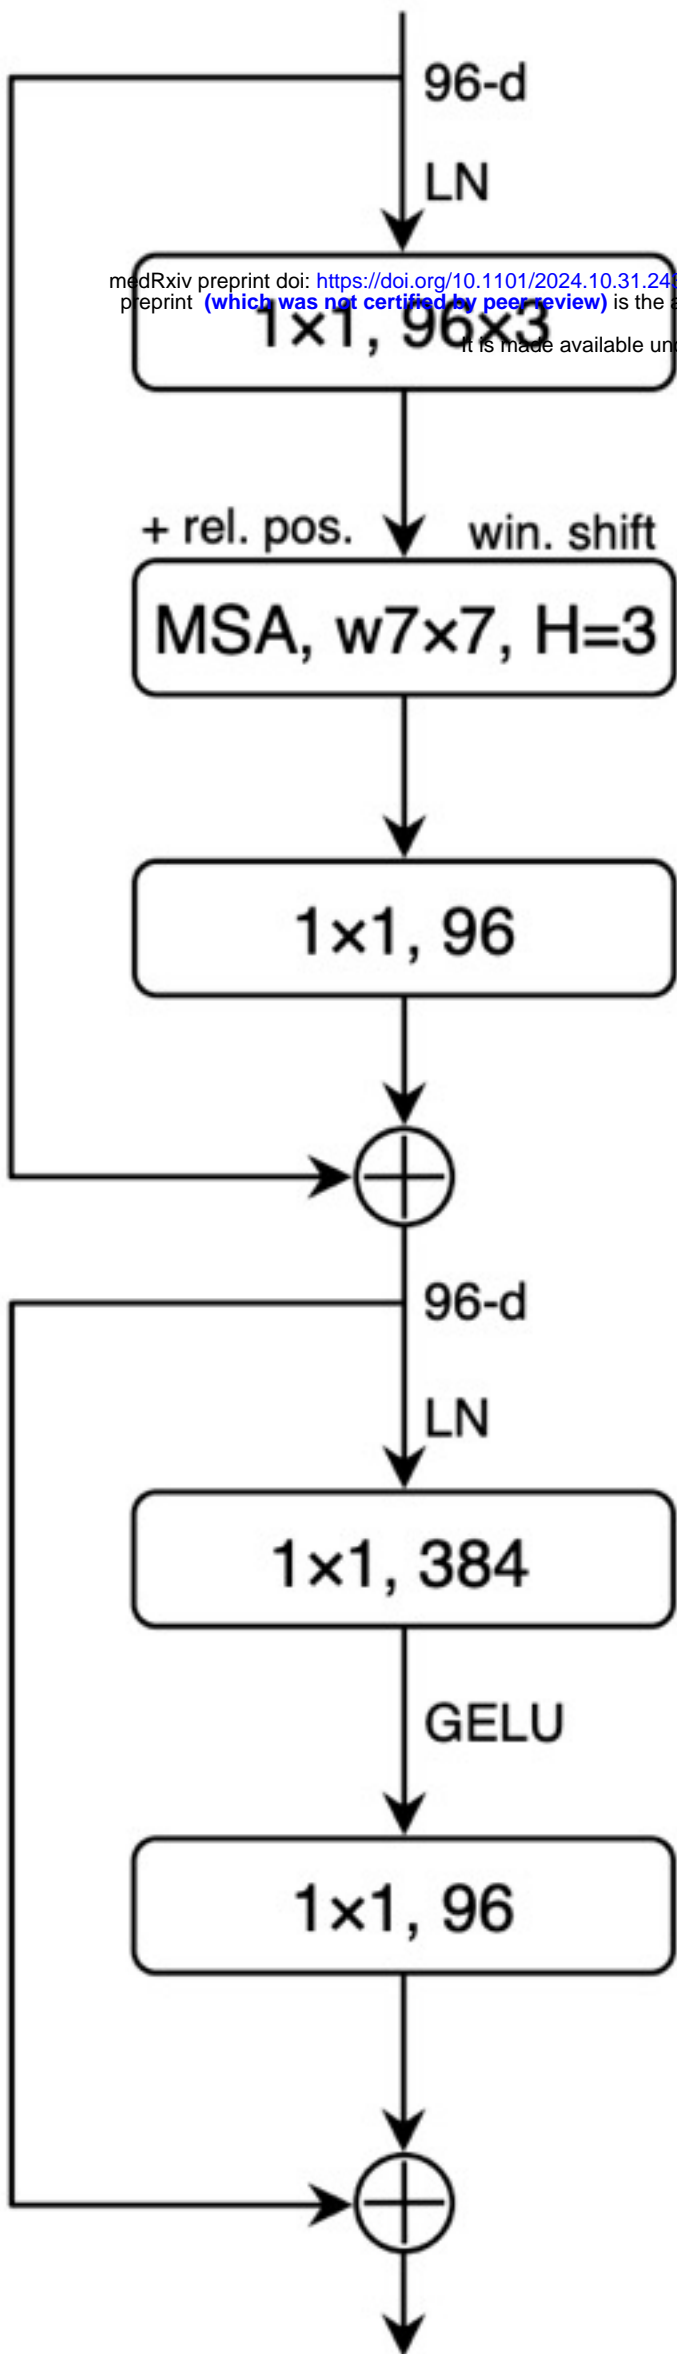

medRxiv preprint doi: <https://doi.org/10.1101/2024.10.31.24316549>; this version posted November 4, 2024. The copyright holder for this preprint (which was not certified by peer review) is the author/funder, who has granted medRxiv a license to display the preprint in perpetuity. It is made available under a [CC-BY 4.0 International license](https://creativecommons.org/licenses/by/4.0/).

## ResNet Block

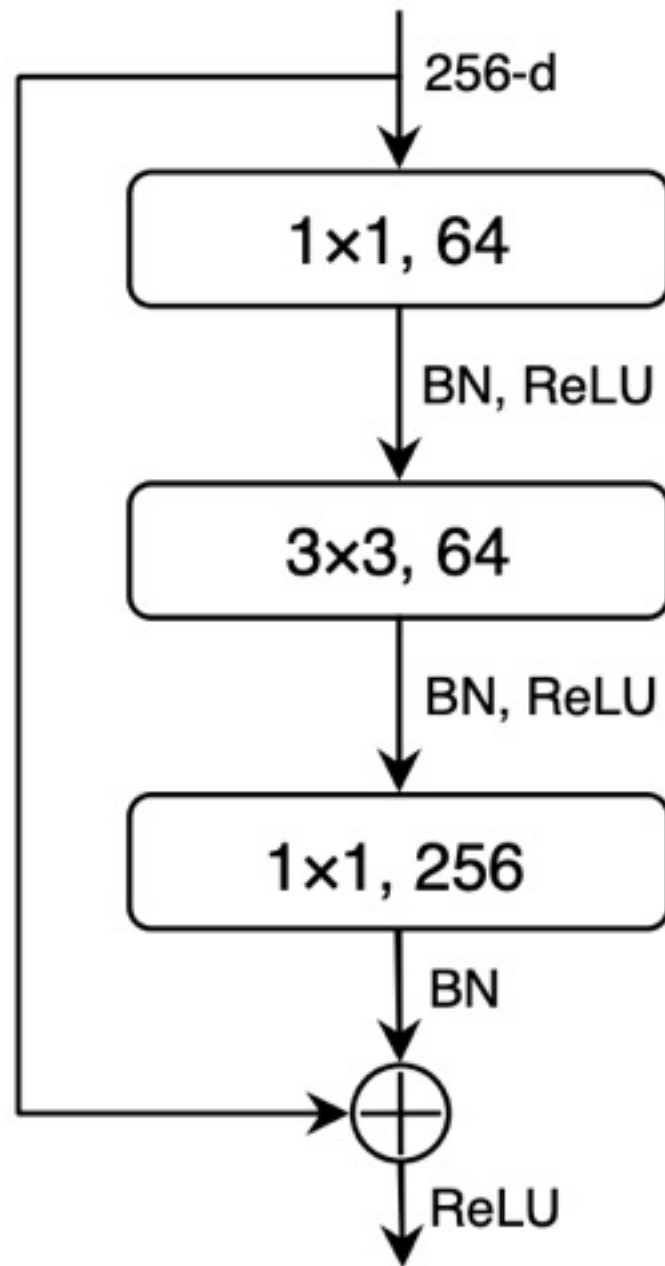

## ConvNeXt Block

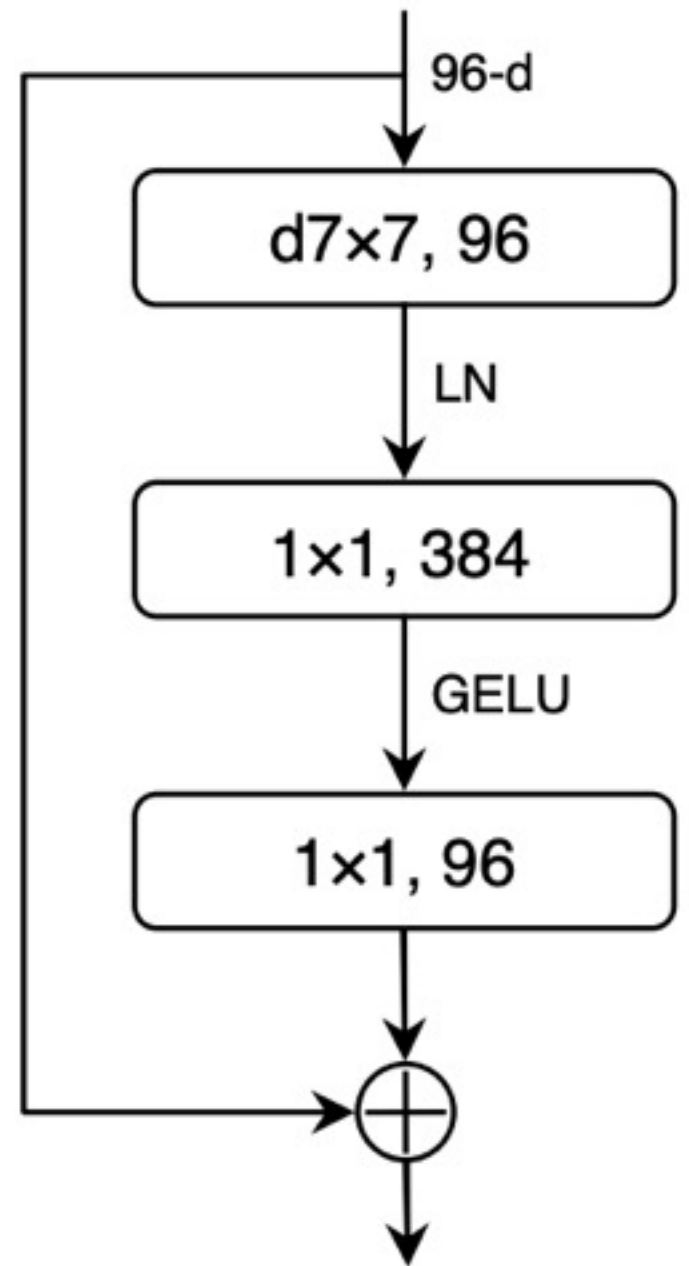

Figure

# ConvNeXt V1 Block

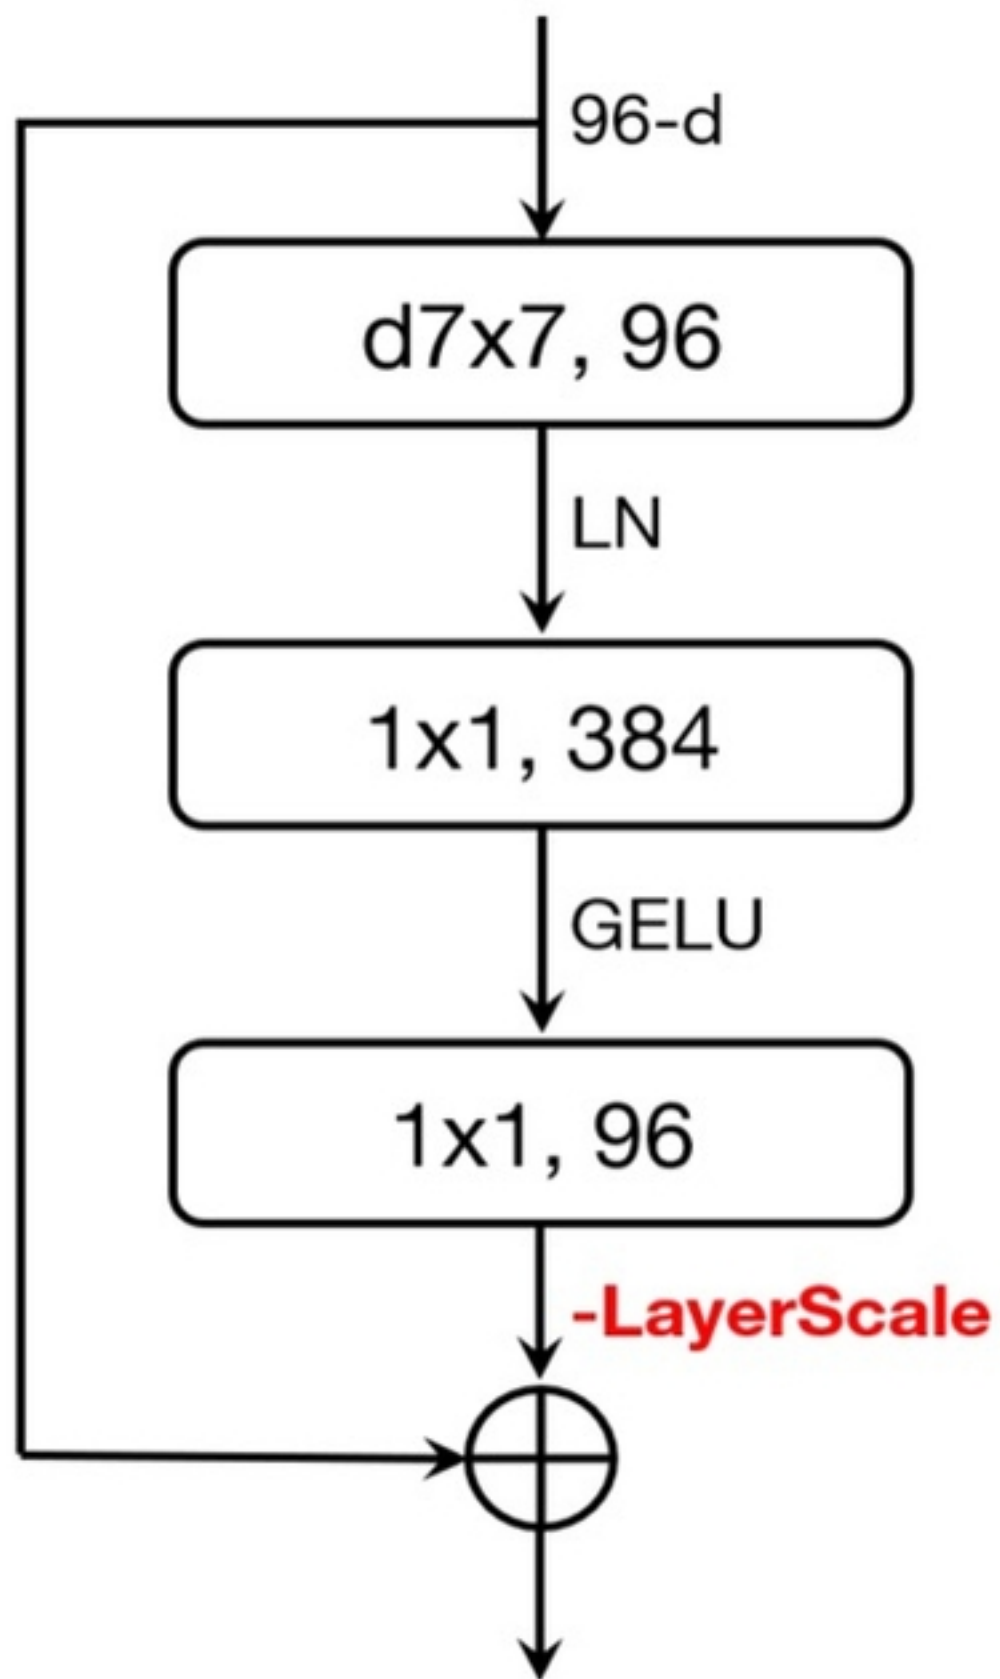

# ConvNeXt V2 Block

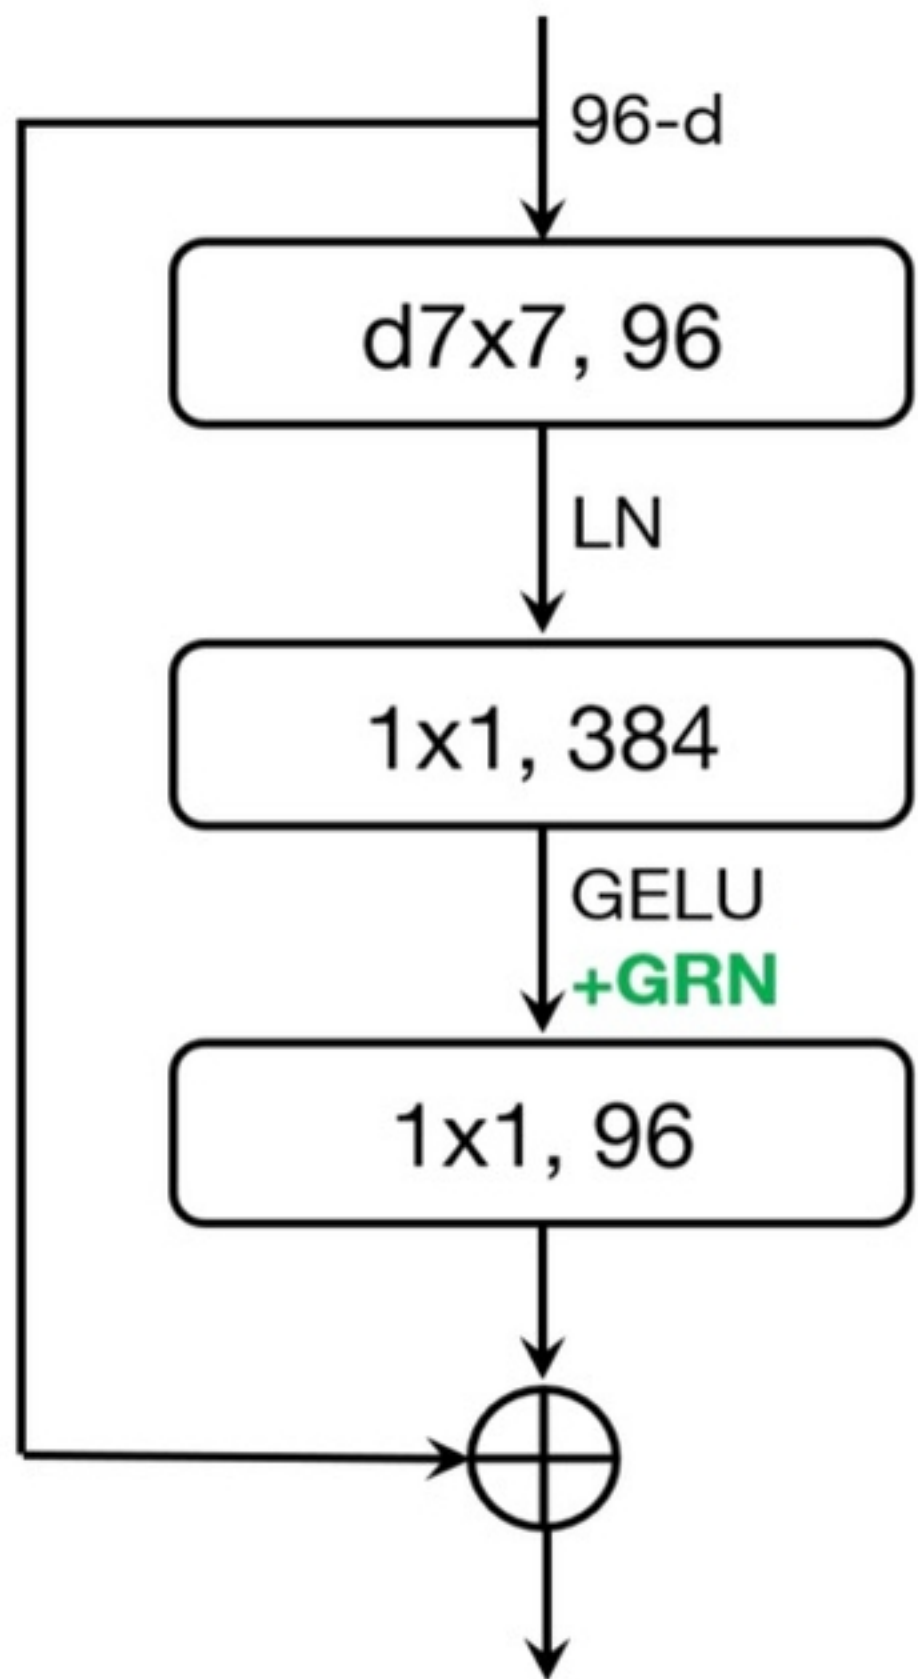

Figure

Heatmap of Model Performance Metrics

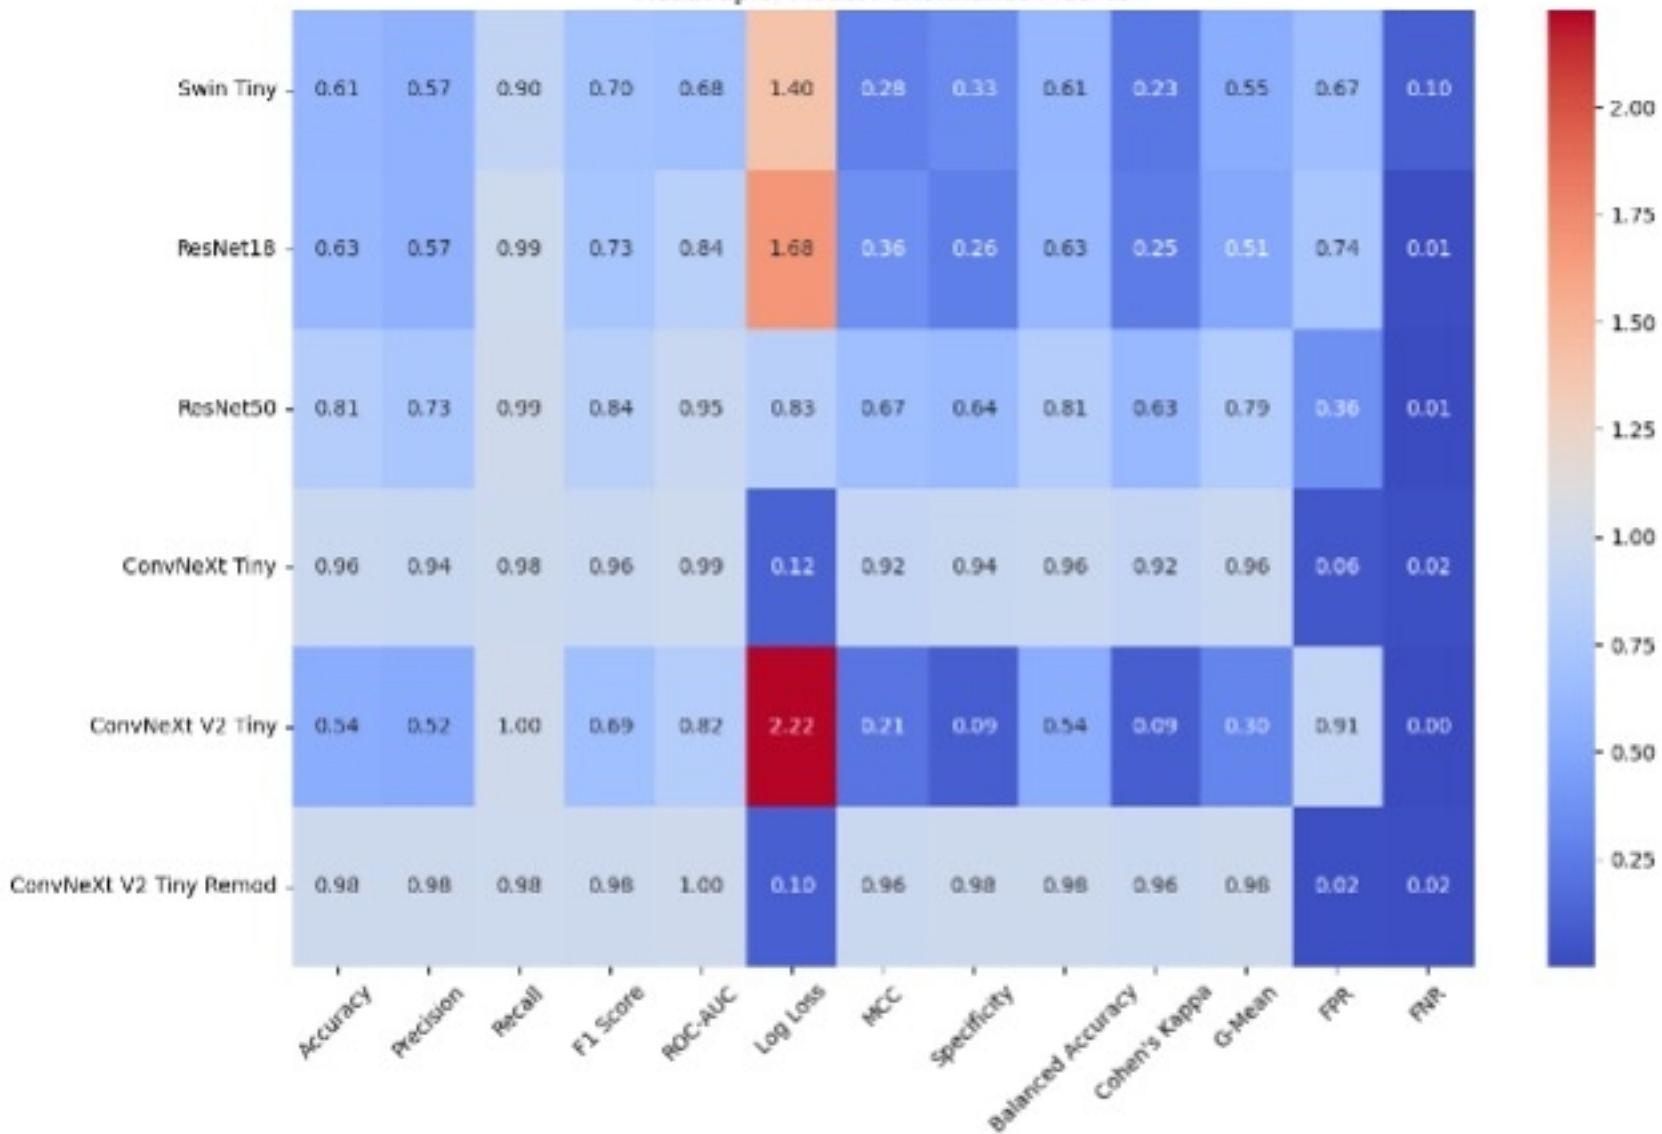

Figure
